# Supplementary material for: Challenging ecogeographical rules: Phenotypic variation in the Mountain Treeshrew (Tupaia montana) along tropical elevational gradients
Source: PLoS One. 2022 Jun 17;17(6):e0268213. doi: 10.1371/journal.pone.0268213 (PMC9205479; doi:10.1371/journal.pone.0268213)
Supplement: S1 Table — (XLSX) [file pone.0268213.s001.xlsx]

## Sheet: TableS1
Individual	Museum_code	Collection	Data_origin	Date_collected	Collector	Specimen_collected_for_museum	Year	Mountain	Location	Elevation	Vegetation_zone	Sex	Reproductive_state	Age	Aged_by_dentition	Aged_by_gonads	Weight	Head_body	Total_lenght	Tail	Hindfoot	Ear	CIL	ZB	UTL	RL	Hair_Scapula	Hair_Rump	D1_weight	D2_headbody	D2_tail	D3_hindfoot	D3_ear	D4_all_adults_NH	D5_hindfoot_USA	D6_skulls
BOR059	EBD31367M	EBD_CSIC	fieldtrip	2012-07-07	Camacho-Sanchez_M	yes	2012	Tambuyukon	Tambuyukon	843	1_Lowland	male	NA	adult	yes	no	NA	NA	NA	NA	NA	NA	45.66	26.28	26.12	21.62	NA	NA	0	0	0	0	0	1	0	1
BOR060	EBD31346M	EBD_CSIC	fieldtrip	2012-07-07	Hawkins_MTR	yes	2012	Tambuyukon	Tambuyukon	836	1_Lowland	female	lactating	adult	yes	no	140	191	327	136	39	14	43.97	24.75	24.01	20.59	12	14.5	0	0	0	0	0	1	1	1
BOR062	EBD31347M	EBD_CSIC	fieldtrip	2012-07-08	Hawkins_MTR	yes	2012	Tambuyukon	Tambuyukon	894	1_Lowland	male	NA	adult	yes	no	134	183	329	146	43	14	44.07	26.62	24.96	20.44	14	18	1	1	1	1	1	1	1	1
BOR063	EBD31348M	EBD_CSIC	fieldtrip	2012-07-09	Camacho-Sanchez_M	yes	2012	Tambuyukon	Tambuyukon	906	1_Lowland	female	NA	adult	yes	no	155	175	325	150	42	17	46.48	26.15	26.31	21.63	14	13	1	1	1	0	0	1	0	1
BOR066	EBD31349M	EBD_CSIC	fieldtrip	2012-07-13	Hawkins_MTR	yes	2012	Tambuyukon	Tambuyukon	1535	2_Lower_montane	female	adult	adult	yes	no	152	201	337	136	42	14	44.62	25.11	24.88	21.60	13	15	1	1	1	1	1	1	1	1
BOR067	EBD31350M	EBD_CSIC	fieldtrip	2012-07-13	Hawkins_MTR	yes	2012	Tambuyukon	Tambuyukon	1544	2_Lower_montane	male	juvenile	adult	yes	no	126	121	238	117	42	13	44.42	25.13	25.08	20.64	14	17	1	0	0	0	0	1	1	1
BOR068	EBD31351M	EBD_CSIC	fieldtrip	2012-07-13	Hawkins_MTR	yes	2012	Tambuyukon	Tambuyukon	1416	2_Lower_montane	male	adult	adult	yes	no	151	197	346	149	44	15	45.96	27.26	25.37	22.18	15	18	1	1	1	1	1	1	1	1
BOR072	EBD30344M	EBD_CSIC	fieldtrip	2012-07-14	Hawkins_MTR	yes	2012	Tambuyukon	Tambuyukon	1415	2_Lower_montane	male	adult	adult	yes	no	158	202	360	158	43	15	44.77	25.56	25.11	20.39	NA	NA	1	1	1	1	1	1	1	1
BOR073	NA	EBD_CSIC	fieldtrip	2012-07-14	Hawkins_MTR	no	2012	Tambuyukon	Tambuyukon	1397	2_Lower_montane	NA	NA	NA	no	no	113	155	292	137	40	14	NA	NA	NA	NA	NA	NA	0	0	0	0	0	0	0	0
BOR076	NA	EBD_CSIC	fieldtrip	2012-07-14	Hawkins_MTR	no	2012	Tambuyukon	Tambuyukon	1415	2_Lower_montane	male	juvenile	NOadult	no	no	85	170	314	144	40	14	NA	NA	NA	NA	NA	NA	0	0	0	0	0	0	0	0
BOR081	EBD31352M	EBD_CSIC	fieldtrip	2012-07-14	Hawkins_MTR	yes	2012	Tambuyukon	Tambuyukon	1416	2_Lower_montane	female	NA	NA	no	no	132	184	326	142	42	14	46.39	25.55	25.72	21.63	12	16	0	0	0	0	0	0	0	1
BOR082	EBD31353M	EBD_CSIC	fieldtrip	2012-07-14	Hawkins_MTR	yes	2012	Tambuyukon	Tambuyukon	1415	2_Lower_montane	male	adult	adult	yes	no	151	197	349	152	44	14	46.56	27.17	26.21	21.95	12	19	1	1	1	1	1	1	1	1
BOR083	EBD31354M	EBD_CSIC	fieldtrip	2012-07-14	Hawkins_MTR	yes	2012	Tambuyukon	Tambuyukon	1397	2_Lower_montane	male	adult	NOadult	yes	no	130	176	326	150	43	14	45.01	NA	NA	NA	NA	NA	0	0	0	0	0	0	0	0
BOR084	EBD31355M	EBD_CSIC	fieldtrip	2012-07-14	Hawkins_MTR	yes	2012	Tambuyukon	Tambuyukon	1415	2_Lower_montane	female	juvenile	NOadult	yes	no	85	161	308	147	41	13	NA	NA	NA	NA	NA	NA	0	0	0	0	0	0	0	0
BOR085	NA	EBD_CSIC	fieldtrip	2012-07-15	Hawkins_MTR	no	2012	Tambuyukon	Tambuyukon	1397	2_Lower_montane	female	adult	adult	no	no	157	145	301	156	43	13	NA	NA	NA	NA	14	15	0	0	0	0	0	1	1	0
BOR087	NA	EBD_CSIC	fieldtrip	2012-07-15	Hawkins_MTR	yes	2012	Tambuyukon	Tambuyukon	1516	2_Lower_montane	female	adult	adult	no	no	126	175	323	148	41	13	NA	NA	NA	NA	NA	NA	0	0	0	0	0	1	1	0
BOR088	NA	EBD_CSIC	fieldtrip	2012-07-16	Hawkins_MTR	yes	2012	Tambuyukon	Tambuyukon	1544	2_Lower_montane	female	juvenile	NOadult	yes	no	110	172	316	144	41	13	43.54	NA	NA	NA	NA	NA	0	0	0	0	0	0	0	1
BOR090	NA	EBD_CSIC	fieldtrip	2012-07-16	Hawkins_MTR	yes	2012	Tambuyukon	Tambuyukon	1504	2_Lower_montane	male	juvenile	NOadult	yes	no	114	170	303	133	42	13	NA	NA	NA	NA	NA	NA	0	0	0	0	0	0	0	0
BOR091	NA	EBD_CSIC	fieldtrip	2012-07-16	Hawkins_MTR	no	2012	Tambuyukon	Tambuyukon	1417	2_Lower_montane	male	juvenile	NOadult	no	no	145	NA	NA	136	43	14	NA	NA	NA	NA	NA	NA	0	0	0	0	0	0	0	0
BOR092	NA	EBD_CSIC	fieldtrip	2012-07-16	Hawkins_MTR	no	2012	Tambuyukon	Tambuyukon	1415	2_Lower_montane	female	juvenile	NOadult	no	no	105	NA	NA	159	39	13	NA	NA	NA	NA	NA	NA	0	0	0	0	0	0	0	0
BOR096	EBD30348M	EBD_CSIC	fieldtrip	2012-07-17	Hawkins_MTR	yes	2012	Tambuyukon	Tambuyukon	1504	2_Lower_montane	male	adult	adult	yes	no	141	194	327	133	43	13	45.42	25.47	25.28	21.69	NA	NA	1	1	1	1	1	1	1	1
BOR097	NA	EBD_CSIC	fieldtrip	2012-07-17	Hawkins_MTR	no	2012	Tambuyukon	Tambuyukon	1535	2_Lower_montane	male	NA	NA	no	no	144	NA	155	150	41	14	NA	NA	NA	NA	NA	NA	0	0	0	0	0	0	0	0
BOR099	NA	EBD_CSIC	fieldtrip	2012-07-17	Hawkins_MTR	no	2012	Tambuyukon	Tambuyukon	1397	2_Lower_montane	female	adult	adult	no	no	144	165	306	141	40	15	NA	NA	NA	NA	NA	NA	0	0	0	0	0	1	1	0
BOR1001	NA	EBD_CSIC	fieldtrip	2016-06-23	Hinckley_A	no	2016	CrockerRange	Gunung_Alap	1900	2_Lower_montane	NA	NA	NOadult	no	no	124	NA	NA	NA	NA	NA	NA	NA	NA	NA	NA	NA	0	0	0	0	0	0	0	0
BOR1002	NA	EBD_CSIC	fieldtrip	2016-06-24	Camacho-Sanchez_M	no	2016	CrockerRange	Gunung_Alap	1900	2_Lower_montane	male	NA	adult	no	no	123	140	NA	NA	35	NA	NA	NA	NA	NA	NA	NA	0	0	0	0	0	1	0	0
BOR1003	NA	EBD_CSIC	fieldtrip	2016-06-24	Camacho-Sanchez_M	no	2016	CrockerRange	Gunung_Alap	1950	2_Lower_montane	NA	NA	adult	no	no	88	NA	NA	NA	NA	NA	NA	NA	NA	NA	NA	NA	0	0	0	0	0	1	0	0
BOR1004	NA	EBD_CSIC	fieldtrip	2016-06-25	Camacho-Sanchez_M	no	2016	CrockerRange	Gunung_Alap	1900	2_Lower_montane	NA	NA	adult	no	no	111	NA	NA	NA	NA	NA	NA	NA	NA	NA	NA	NA	0	0	0	0	0	1	0	0
BOR1005	NA	EBD_CSIC	fieldtrip	2016-06-25	Camacho-Sanchez_M	no	2016	CrockerRange	Gunung_Alap	1900	2_Lower_montane	NA	NA	adult	no	no	113	NA	NA	NA	NA	NA	NA	NA	NA	NA	NA	NA	0	0	0	0	0	1	0	0
BOR1009	NA	EBD_CSIC	fieldtrip	2016-06-27	Camacho-Sanchez_M	no	2016	CrockerRange	Gunung_Alap	1950	2_Lower_montane	female	NA	NA	no	no	102	NA	NA	137	35	10	NA	NA	NA	NA	NA	NA	0	0	0	0	0	0	0	0
BOR1013	NA	EBD_CSIC	fieldtrip	2016-06-27	Camacho-Sanchez_M	no	2016	CrockerRange	Gunung_Alap	1900	2_Lower_montane	NA	NA	NA	no	no	101	NA	NA	NA	NA	NA	NA	NA	NA	NA	NA	NA	0	0	0	0	0	0	0	0
BOR102	NA	EBD_CSIC	fieldtrip	2012-07-18	Hawkins_MTR	no	2012	Tambuyukon	Tambuyukon	1415	2_Lower_montane	male	juvenile	NOadult	no	no	128	152	298	146	38	14	NA	NA	NA	NA	NA	NA	0	0	0	0	0	0	0	0
BOR103	NA	EBD_CSIC	fieldtrip	2012-07-18	Hawkins_MTR	no	2012	Tambuyukon	Tambuyukon	1417	2_Lower_montane	male	adult	adult	no	no	130	NA	320	150	38	13	NA	NA	NA	NA	NA	NA	0	0	0	0	0	1	1	0
BOR1031	NA	EBD_CSIC	fieldtrip	2016-07-06	Camacho-Sanchez_M	no	2016	TrusMadi	Mountain_resthouse	NA	NA	NA	NA	NA	no	no	131	NA	NA	NA	NA	NA	NA	NA	NA	NA	NA	NA	0	0	0	0	0	0	0	0
BOR1037	NA	EBD_CSIC	fieldtrip	2016-07-06	Camacho-Sanchez_M	no	2016	TrusMadi	Mountain_resthouse	2330	3_Upper_montane	male	NA	adult	no	no	111	NA	NA	NA	NA	NA	NA	NA	NA	NA	NA	NA	0	0	0	0	0	1	0	0
BOR104	EBD31356M	EBD_CSIC	fieldtrip	2012-07-18	Hawkins_MTR	yes	2012	Tambuyukon	Tambuyukon	1415	2_Lower_montane	female	adult	NOadult	yes	no	118	NA	307	147	40	14	44.12	NA	NA	NA	NA	NA	0	0	0	0	0	0	0	0
BOR1041	NA	EBD_CSIC	fieldtrip	2016-07-07	Camacho-Sanchez_M	no	2016	TrusMadi	Mountain_resthouse	2330	3_Upper_montane	female	NA	adult	no	no	92	NA	NA	NA	NA	NA	NA	NA	NA	NA	NA	NA	0	0	0	0	0	1	0	0
BOR1042	NA	EBD_CSIC	fieldtrip	2016-07-07	Hinckley_A	no	2016	TrusMadi	Mountain_resthouse	2050	3_Upper_montane	male	NA	adult	no	no	93	NA	NA	NA	NA	NA	NA	NA	NA	NA	NA	NA	0	0	0	0	0	1	0	0
BOR1045	NA	EBD_CSIC	fieldtrip	2016-07-08	Camacho-Sanchez_M	no	2016	TrusMadi	Mountain_resthouse	2402	3_Upper_montane	male	NA	adult	no	no	110	NA	NA	NA	NA	NA	NA	NA	NA	NA	NA	NA	0	0	0	0	0	1	0	0
BOR1047	NA	EBD_CSIC	fieldtrip	2016-07-08	Camacho-Sanchez_M	no	2016	TrusMadi	Mountain_resthouse	2402	3_Upper_montane	female	NA	adult	no	no	93	NA	NA	NA	NA	NA	NA	NA	NA	NA	NA	NA	0	0	0	0	0	1	0	0
BOR105	NA	EBD_CSIC	fieldtrip	2012-07-18	Hawkins_MTR	no	2012	Tambuyukon	Tambuyukon	1415	2_Lower_montane	female	adult	adult	no	no	140	NA	NA	137	40	12	NA	NA	NA	NA	NA	NA	0	0	0	0	0	1	1	0
BOR1057	NA	EBD_CSIC	fieldtrip	2016-07-08	Camacho-Sanchez_M	no	2016	TrusMadi	Mountain_resthouse	2330	3_Upper_montane	male	NA	adult	no	no	141	NA	NA	NA	NA	NA	NA	NA	NA	NA	NA	NA	0	0	0	0	0	1	0	0
BOR1059	NA	EBD_CSIC	fieldtrip	2016-07-09	Camacho-Sanchez_M	no	2016	TrusMadi	Mountain_resthouse	2330	3_Upper_montane	male	NA	NOadult	no	no	92	NA	NA	NA	NA	NA	NA	NA	NA	NA	NA	NA	0	0	0	0	0	0	0	0
BOR106	NA	EBD_CSIC	fieldtrip	2012-07-18	Hawkins_MTR	no	2012	Tambuyukon	Tambuyukon	1397	2_Lower_montane	female	NA	NA	no	no	140	NA	189	138	38	12	NA	NA	NA	NA	NA	NA	0	0	0	0	0	0	0	0
BOR1062	NA	EBD_CSIC	fieldtrip	2016-07-08	Hinckley_A	no	2016	TrusMadi	Mountain_resthouse	2050	3_Upper_montane	NA	NA	NA	no	no	104	NA	NA	NA	NA	NA	NA	NA	NA	NA	NA	NA	0	0	0	0	0	0	0	0
BOR107	NA	EBD_CSIC	fieldtrip	2012-07-18	Hawkins_MTR	no	2012	Tambuyukon	Tambuyukon	1397	2_Lower_montane	NA	juvenile	Noadult	no	no	53	NA	NA	137	39	10	NA	NA	NA	NA	NA	NA	0	0	0	0	0	0	0	0
BOR1072	NA	EBD_CSIC	fieldtrip	2016-07-14	Hinckley_A	no	2016	TrusMadi	Mountain_summit	2600	3_Upper_montane	NA	NA	NOadult	no	no	112	NA	NA	NA	NA	NA	NA	NA	NA	NA	NA	NA	0	0	0	0	0	0	0	0
BOR1073	NA	EBD_CSIC	fieldtrip	2016-07-09	Camacho-Sanchez_M	no	2016	TrusMadi	Mountain_summit	2554	3_Upper_montane	male	NA	adult	no	no	107	NA	NA	NA	NA	NA	NA	NA	NA	NA	NA	NA	0	0	0	0	0	1	0	0
BOR1078	NA	EBD_CSIC	fieldtrip	2016-07-14	Hinckley_A	no	2016	TrusMadi	Mountain_summit	2600	3_Upper_montane	male	NA	adult	no	no	100	NA	NA	NA	NA	NA	NA	NA	NA	NA	NA	NA	0	0	0	0	0	1	0	0
BOR108	NA	EBD_CSIC	fieldtrip	2012-07-18	Hawkins_MTR	no	2012	Tambuyukon	Tambuyukon	1535	2_Lower_montane	female	juvenile	NOadult	no	no	82	NA	NA	146	35	10	NA	NA	NA	NA	NA	NA	0	0	0	0	0	0	0	0
BOR1084	NA	EBD_CSIC	fieldtrip	2016-07-14	Hinckley_A	no	2016	TrusMadi	Mountain_summit	2600	3_Upper_montane	NA	NA	adult	no	no	130	NA	NA	NA	NA	NA	NA	NA	NA	NA	NA	NA	0	0	0	0	0	1	0	0
BOR1085	NA	EBD_CSIC	fieldtrip	2016-07-10	Camacho-Sanchez_M	no	2016	TrusMadi	Mountain_summit	2554	3_Upper_montane	male	NA	adult	no	no	121	NA	NA	NA	NA	NA	NA	NA	NA	NA	NA	NA	0	0	0	0	0	1	0	0
BOR1087	NA	EBD_CSIC	fieldtrip	2016-07-10	Camacho-Sanchez_M	no	2016	TrusMadi	Mountain_summit	2554	3_Upper_montane	NA	NA	adult	no	no	132	NA	NA	NA	NA	NA	NA	NA	NA	NA	NA	NA	0	0	0	0	0	1	0	0
BOR1089	NA	EBD_CSIC	fieldtrip	2016-07-10	Camacho-Sanchez_M	no	2016	TrusMadi	Mountain_summit	2554	3_Upper_montane	male	NA	adult	no	no	118	NA	NA	NA	NA	NA	NA	NA	NA	NA	NA	NA	0	0	0	0	0	1	0	0
BOR109	NA	EBD_CSIC	fieldtrip	2012-07-18	Hawkins_MTR	no	2012	Tambuyukon	Tambuyukon	1516	2_Lower_montane	female	adult	adult	no	no	138	180	336	156	39	14	NA	NA	NA	NA	NA	NA	0	0	0	0	0	1	1	0
BOR1092	NA	EBD_CSIC	fieldtrip	2016-07-14	Hinckley_A	no	2016	TrusMadi	Mountain_summit	2600	3_Upper_montane	female	NA	adult	no	no	100	NA	NA	NA	NA	NA	NA	NA	NA	NA	NA	NA	0	0	0	0	0	1	0	0
BOR1094	NA	EBD_CSIC	fieldtrip	2016-07-14	Hinckley_A	no	2016	TrusMadi	Mountain_summit	2600	3_Upper_montane	female	NA	adult	no	no	114	NA	NA	NA	NA	NA	NA	NA	NA	NA	NA	NA	0	0	0	0	0	1	0	0
BOR1095	NA	EBD_CSIC	fieldtrip	2016-07-13	Camacho-Sanchez_M	no	2016	TrusMadi	Mountain_summit	2600	3_Upper_montane	female	NA	adult	no	no	101	NA	NA	NA	NA	NA	NA	NA	NA	NA	NA	NA	0	0	0	0	0	1	0	0
BOR1099	NA	EBD_CSIC	fieldtrip	2016-07-13	Camacho-Sanchez_M	no	2016	TrusMadi	Mountain_summit	2600	3_Upper_montane	male	NA	adult	no	no	123	NA	NA	NA	NA	NA	NA	NA	NA	NA	NA	NA	0	0	0	0	0	1	0	0
BOR110	NA	EBD_CSIC	fieldtrip	2012-07-19	Hawkins_MTR	no	2012	Tambuyukon	Tambuyukon	1416	2_Lower_montane	female	adult	adult	no	no	150	185	339	154	41	13	NA	NA	NA	NA	NA	NA	0	0	0	0	0	1	1	0
BOR1104	NA	EBD_CSIC	fieldtrip	2016-07-22	Hinckley_A	no	2016	TrusMadi	Mirad_Irad	900	1_Lowland	NA	NA	adult	no	no	110	NA	NA	NA	NA	NA	NA	NA	NA	NA	NA	NA	0	0	0	0	0	1	0	0
BOR1105	NA	EBD_CSIC	fieldtrip	2016-07-13	Camacho-Sanchez_M	no	2016	TrusMadi	Mountain_summit	2600	3_Upper_montane	female	NA	adult	no	no	121	NA	NA	NA	NA	NA	NA	NA	NA	NA	NA	NA	0	0	0	0	0	1	0	0
BOR1109	NA	EBD_CSIC	fieldtrip	2016-07-13	Camacho-Sanchez_M	no	2016	TrusMadi	Mountain_summit	2600	3_Upper_montane	NA	NA	NA	no	no	136	NA	NA	NA	NA	NA	NA	NA	NA	NA	NA	NA	0	0	0	0	0	0	0	0
BOR1114	NA	EBD_CSIC	fieldtrip	2016-07-24	Hinckley_A	no	2016	TrusMadi	Mirad_Irad	900	1_Lowland	NA	NA	NA	no	no	105	NA	NA	NA	NA	NA	NA	NA	NA	NA	NA	NA	0	0	0	0	0	0	0	0
BOR1117	NA	EBD_CSIC	fieldtrip	2016-07-13	Camacho-Sanchez_M	no	2016	TrusMadi	Mountain_summit	2600	3_Upper_montane	female	NA	adult	no	no	130	NA	NA	NA	NA	NA	NA	NA	NA	NA	NA	NA	0	0	0	0	0	1	0	0
BOR1121	NA	EBD_CSIC	fieldtrip	2016-07-13	Camacho-Sanchez_M	no	2016	TrusMadi	Mountain_summit	2600	3_Upper_montane	female	NA	adult	no	no	136	NA	NA	NA	NA	NA	NA	NA	NA	NA	NA	NA	0	0	0	0	0	1	0	0
BOR1123	NA	EBD_CSIC	fieldtrip	2016-07-13	Camacho-Sanchez_M	no	2016	TrusMadi	Mountain_summit	2600	3_Upper_montane	male	NA	adult	no	no	128	NA	NA	NA	NA	NA	NA	NA	NA	NA	NA	NA	0	0	0	0	0	1	0	0
BOR114	NA	EBD_CSIC	fieldtrip	2012-07-19	Hawkins_MTR	no	2012	Tambuyukon	Tambuyukon	1417	2_Lower_montane	male	adult	adult	no	no	129	NA	NA	146	41	15	NA	NA	NA	NA	NA	NA	0	0	0	0	0	1	1	0
BOR115	NA	EBD_CSIC	fieldtrip	2012-07-19	Hawkins_MTR	no	2012	Tambuyukon	Tambuyukon	1417	2_Lower_montane	male	adult	adult	no	no	157	NA	NA	153	41	13	NA	NA	NA	NA	NA	NA	0	0	0	0	0	1	1	0
BOR116	NA	EBD_CSIC	fieldtrip	2012-07-19	Hawkins_MTR	no	2012	Tambuyukon	Tambuyukon	1535	2_Lower_montane	male	adult	adult	no	no	130	NA	NA	142	39	14	NA	NA	NA	NA	NA	NA	0	0	0	0	0	1	1	0
BOR1163	NA	EBD_CSIC	fieldtrip	2016-07-19	Camacho-Sanchez_M	no	2016	TrusMadi	Mountain_summit	2600	3_Upper_montane	male	NA	adult	no	no	132	NA	NA	NA	NA	NA	NA	NA	NA	NA	NA	NA	0	0	0	0	0	1	0	0
BOR117	NA	EBD_CSIC	fieldtrip	2012-07-19	Hawkins_MTR	no	2012	Tambuyukon	Tambuyukon	1417	2_Lower_montane	female	adult	adult	no	no	136	NA	NA	150	37	12	NA	NA	NA	NA	NA	NA	0	0	0	0	0	1	1	0
BOR1171	NA	EBD_CSIC	fieldtrip	2016-07-24	Camacho-Sanchez_M	no	2016	TrusMadi	Mirad_Irad	900	1_Lowland	NA	NA	adult	no	no	115	NA	NA	NA	NA	NA	NA	NA	NA	NA	NA	NA	0	0	0	0	0	1	0	0
BOR1177	NA	EBD_CSIC	fieldtrip	2016-07-25	Camacho-Sanchez_M	no	2016	TrusMadi	Mirad_Irad	900	1_Lowland	male	NA	adult	no	no	128	NA	NA	NA	NA	NA	NA	NA	NA	NA	NA	NA	0	0	0	0	0	1	0	0
BOR120	NA	EBD_CSIC	fieldtrip	2012-07-19	Hawkins_MTR	no	2012	Tambuyukon	Tambuyukon	1419	2_Lower_montane	male	adult	adult	no	no	156	NA	NA	142	40	16	NA	NA	NA	NA	NA	NA	0	0	0	0	0	1	1	0
BOR121	NA	EBD_CSIC	fieldtrip	2012-07-20	Hawkins_MTR	no	2012	Tambuyukon	Tambuyukon	1416	2_Lower_montane	NA	juvenile	NOadult	no	no	84	NA	NA	149	41	13	NA	NA	NA	NA	NA	NA	0	0	0	0	0	0	0	0
BOR122	NA	EBD_CSIC	fieldtrip	2012-07-20	Hawkins_MTR	no	2012	Tambuyukon	Tambuyukon	1416	2_Lower_montane	female	adult	adult	no	no	88	NA	NA	135	39	13	NA	NA	NA	NA	NA	NA	0	0	0	0	0	1	1	0
BOR124	NA	EBD_CSIC	fieldtrip	2012-07-20	Hawkins_MTR	no	2012	Tambuyukon	Tambuyukon	1415	2_Lower_montane	male	adult	adult	no	no	132	NA	NA	133	39	14	NA	NA	NA	NA	NA	NA	0	0	0	0	0	1	1	0
BOR125	NA	EBD_CSIC	fieldtrip	2012-07-20	Hawkins_MTR	no	2012	Tambuyukon	Tambuyukon	1415	2_Lower_montane	male	adult	adult	no	no	127	NA	NA	145	40	15	NA	NA	NA	NA	NA	NA	0	0	0	0	0	1	1	0
BOR126	NA	EBD_CSIC	fieldtrip	2012-07-20	Hawkins_MTR	no	2012	Tambuyukon	Tambuyukon	1397	2_Lower_montane	female	NA	NA	no	no	128	NA	NA	145	38	14	NA	NA	NA	NA	NA	NA	0	0	0	0	0	0	0	0
BOR127	NA	EBD_CSIC	fieldtrip	2012-07-20	Hawkins_MTR	no	2012	Tambuyukon	Tambuyukon	1397	2_Lower_montane	male	adult	adult	no	no	134	NA	NA	146	37	16	NA	NA	NA	NA	NA	NA	0	0	0	0	0	1	1	0
BOR128	NA	EBD_CSIC	fieldtrip	2012-07-20	Hawkins_MTR	no	2012	Tambuyukon	Tambuyukon	1397	2_Lower_montane	NA	adult	adult	no	no	97	NA	NA	145	40	14	NA	NA	NA	NA	NA	NA	0	0	0	0	0	1	0	0
BOR129	NA	EBD_CSIC	fieldtrip	2012-07-21	Hawkins_MTR	no	2012	Tambuyukon	Tambuyukon	1397	2_Lower_montane	female	adult	adult	no	no	126	NA	NA	144	41	14	NA	NA	NA	NA	NA	NA	0	0	0	0	0	1	1	0
BOR131	NA	EBD_CSIC	fieldtrip	2012-07-21	Hawkins_MTR	no	2012	Tambuyukon	Tambuyukon	1504	2_Lower_montane	male	juvenile	NOadult	no	no	NA	NA	NA	132	37	11	NA	NA	NA	NA	NA	NA	0	0	0	0	0	0	0	0
BOR134	NA	EBD_CSIC	fieldtrip	2012-07-22	Hawkins_MTR	no	2012	Tambuyukon	Tambuyukon	1516	2_Lower_montane	male	adult	adult	no	no	222	155	293	138	42	15	NA	NA	NA	NA	NA	NA	0	0	0	0	0	1	1	0
BOR136	EBD31357M	EBD_CSIC	fieldtrip	2012-07-24	Hawkins_MTR	yes	2012	Tambuyukon	Tambuyukon	2050	3_Upper_montane	male	adult	adult	yes	no	135	236	364	128	40	15	44.70	25.10	25.14	20.46	15	20	1	0	0	0	0	1	1	1
BOR137	EBD30351M	EBD_CSIC	fieldtrip	2012-07-25	Hawkins_MTR	yes	2012	Tambuyukon	Tambuyukon	2048	3_Upper_montane	male	juvenile	adult	yes	no	120	180	307	127	45	14	43.38	25.79	23.85	19.36	NA	NA	1	1	1	1	1	1	1	1
BOR138	EBD31358M	EBD_CSIC	fieldtrip	2012-07-25	Hawkins_MTR	yes	2012	Tambuyukon	Tambuyukon	2051	3_Upper_montane	female	juvenile	adult	yes	no	116	173	309	136	42	15	41.29	25.07	23.21	19.39	15	21	1	1	1	1	1	1	1	1
BOR139	EBD30352M	EBD_CSIC	fieldtrip	2012-07-26	Hawkins_MTR	yes	2012	Tambuyukon	Tambuyukon	2049	3_Upper_montane	male	adult	adult	yes	no	140	167	320	153	40	16	45.41	26.57	NA	21.01	NA	NA	1	1	1	1	1	1	1	1
BOR146	EBD31359M	EBD_CSIC	fieldtrip	2012-07-28	Camacho-Sanchez_M	yes	2012	Tambuyukon	Tambuyukon	2051	3_Upper_montane	female	adult	adult	yes	no	110	157	302	145	39	14	42.17	25.33	24.33	20.02	18	20	1	1	1	0	0	1	0	1
BOR147	EBD31360M	EBD_CSIC	fieldtrip	2012-07-28	Camacho-Sanchez_M	yes	2012	Tambuyukon	Tambuyukon	2051	3_Upper_montane	male	adult	adult	yes	no	120	184	310	126	40	15	44.50	25.32	25.43	20.83	17.5	23	1	1	1	0	0	1	0	1
BOR149	NA	EBD_CSIC	fieldtrip	2012-07-29	Hawkins_MTR	no	2012	Tambuyukon	Tambuyukon	2045	3_Upper_montane	female	juvenile	NOadult	no	no	120	179	337	158	39	12	NA	NA	NA	NA	NA	NA	0	0	0	0	0	0	0	0
BOR150	NA	EBD_CSIC	fieldtrip	2012-07-29	Hawkins_MTR	no	2012	Tambuyukon	Tambuyukon	1851	2_Lower_montane	female	juvenile	NOadult	no	no	125	157	285	128	41	14	NA	NA	NA	NA	NA	NA	0	0	0	0	0	0	0	0
BOR153	NA	EBD_CSIC	fieldtrip	2012-07-29	Hawkins_MTR	no	2012	Tambuyukon	Tambuyukon	2048	3_Upper_montane	male	juvenile	NOadult	no	no	150	163	295	132	39	14	NA	NA	NA	NA	NA	NA	0	0	0	0	0	0	0	0
BOR154	NA	EBD_CSIC	fieldtrip	2012-07-29	Hawkins_MTR	no	2012	Tambuyukon	Tambuyukon	2050	3_Upper_montane	male	adult	adult	no	no	130	176	319	143	42	16	NA	NA	NA	NA	NA	NA	0	0	0	0	0	1	1	0
BOR162	NA	EBD_CSIC	fieldtrip	2012-07-31	Camacho-Sanchez_M	no	2012	Tambuyukon	Tambuyukon	2040	3_Upper_montane	female	adult	adult	no	no	127	NA	NA	137	37	13	NA	NA	NA	NA	NA	NA	0	0	0	0	0	1	0	0
BOR163	NA	EBD_CSIC	fieldtrip	2012-07-31	Camacho-Sanchez_M	no	2012	Tambuyukon	Tambuyukon	2051	3_Upper_montane	male	juvenile	NOadult	no	no	75	170	310	140	37	12	NA	NA	NA	NA	NA	NA	0	0	0	0	0	0	0	0
BOR164	NA	EBD_CSIC	fieldtrip	2012-07-31	Camacho-Sanchez_M	no	2012	Tambuyukon	Tambuyukon	2046	3_Upper_montane	female	adult	adult	no	no	85	NA	NA	140	38	14	NA	NA	NA	NA	NA	NA	0	0	0	0	0	1	0	0
BOR165	NA	EBD_CSIC	fieldtrip	2012-07-31	Camacho-Sanchez_M	no	2012	Tambuyukon	Tambuyukon	2047	3_Upper_montane	female	adult	adult	no	no	145	NA	NA	141	38	15	NA	NA	NA	NA	NA	NA	0	0	0	0	0	1	0	0
BOR166	NA	EBD_CSIC	fieldtrip	2012-07-31	Camacho-Sanchez_M	no	2012	Tambuyukon	Tambuyukon	2050	3_Upper_montane	male	adult	adult	no	no	145	NA	NA	141	37	14	NA	NA	NA	NA	NA	NA	0	0	0	0	0	1	0	0
BOR167	NA	EBD_CSIC	fieldtrip	2012-07-31	Camacho-Sanchez_M	no	2012	Tambuyukon	Tambuyukon	2049	3_Upper_montane	female	adult	adult	no	no	142	NA	NA	140	40	14	NA	NA	NA	NA	NA	NA	0	0	0	0	0	1	0	0
BOR202	EBD31361M	EBD_CSIC	fieldtrip	2012-08-01	Hawkins_MTR	yes	2012	Tambuyukon	Tambuyukon	2495	3_Upper_montane	NA	baby	NOadult	yes	no	41	143	246	103	40	12	NA	NA	NA	NA	NA	NA	0	0	0	0	0	0	0	0
BOR203	EBD31362M	EBD_CSIC	fieldtrip	2012-08-01	Hawkins_MTR	yes	2012	Tambuyukon	Tambuyukon	2477	3_Upper_montane	female	juvenile	adult	yes	no	108	176	304	128	41	10	43.55	25.59	24.70	20.07	15	20	1	1	1	1	0	1	1	1
BOR204	EBD31363M	EBD_CSIC	fieldtrip	2012-08-01	Hawkins_MTR	yes	2012	Tambuyukon	Tambuyukon	2495	3_Upper_montane	male	juvenile	adult	yes	no	111	174	303	129	42	14	44.89	26.52	24.84	20.69	18	20	1	1	1	1	1	1	1	1
BOR205	EBD31364M	EBD_CSIC	fieldtrip	2012-08-01	Hawkins_MTR	yes	2012	Tambuyukon	Tambuyukon	2477	3_Upper_montane	female	juvenile	adult	yes	no	123	161	297	136	39	14	43.44	26.35	24.71	20.48	16	20	1	1	1	1	1	1	1	1
BOR206	EBD31365M	EBD_CSIC	fieldtrip	2012-08-01	Hawkins_MTR	yes	2012	Tambuyukon	Tambuyukon	2495	3_Upper_montane	NA	baby	NOadult	yes	no	44	143	240	97	38	12	NA	NA	NA	NA	NA	NA	0	0	0	0	0	0	0	0
BOR211	EBD31366M	EBD_CSIC	fieldtrip	2012-08-01	Hawkins_MTR	yes	2012	Tambuyukon	Tambuyukon	2480	3_Upper_montane	female	juvenile	adult	yes	no	114	183	324	141	43	15	44.32	26.20	24.89	20.31	17	21	1	1	1	1	1	1	1	1
BOR214	NA	EBD_CSIC	fieldtrip	2012-08-02	Hawkins_MTR	no	2012	Tambuyukon	Tambuyukon	2449	3_Upper_montane	female	adult	adult	no	no	121	174	303	129	43	12	NA	NA	NA	NA	NA	NA	0	0	0	0	0	1	1	0
BOR215	NA	EBD_CSIC	fieldtrip	2012-08-02	Hawkins_MTR	no	2012	Tambuyukon	Tambuyukon	2381	3_Upper_montane	male	juvenile	NOadult	no	no	123	150	300	150	43	13	NA	NA	NA	NA	NA	NA	0	0	0	0	0	0	0	0
BOR219	NA	EBD_CSIC	fieldtrip	2012-08-02	Hawkins_MTR	no	2012	Tambuyukon	Tambuyukon	2495	3_Upper_montane	male	juvenile	NOadult	no	no	135	138	269	131	43	12	NA	NA	NA	NA	NA	NA	0	0	0	0	0	0	0	0
BOR220	NA	EBD_CSIC	fieldtrip	2012-08-02	Hawkins_MTR	no	2012	Tambuyukon	Tambuyukon	2449	3_Upper_montane	female	juvenile	NOadult	no	no	125	NA	150	143	42	30	NA	NA	NA	NA	NA	NA	0	0	0	0	0	0	0	0
BOR221	NA	EBD_CSIC	fieldtrip	2012-08-02	Hawkins_MTR	no	2012	Tambuyukon	Tambuyukon	2480	3_Upper_montane	female	juvenile	NOadult	no	no	103	152	NA	133	40	13	NA	NA	NA	NA	NA	NA	0	0	0	0	0	0	0	0
BOR224	NA	EBD_CSIC	fieldtrip	2012-08-03	Hawkins_MTR	no	2012	Tambuyukon	Tambuyukon	2495	3_Upper_montane	female	juvenile	NOadult	no	no	123	155	NA	170	46	14	NA	NA	NA	NA	NA	NA	0	0	0	0	0	0	0	0
BOR225	NA	EBD_CSIC	fieldtrip	2012-08-03	Hawkins_MTR	no	2012	Tambuyukon	Tambuyukon	2381	3_Upper_montane	female	juvenile	NOadult	no	no	119	NA	154	133	38	14	NA	NA	NA	NA	NA	NA	0	0	0	0	0	0	0	0
BOR227	NA	EBD_CSIC	fieldtrip	2012-08-03	Hawkins_MTR	no	2012	Tambuyukon	Tambuyukon	2495	3_Upper_montane	male	juvenile	NOadult	no	no	123	154	NA	145	41	13	NA	NA	NA	NA	NA	NA	0	0	0	0	0	0	0	0
BOR250	EBD31368M	EBD_CSIC	fieldtrip	2013-02-24	Hawkins_MTR	yes	2013	Kinabalu	Kinabalu	1589	2_Lower_montane	male	adult	adult	yes	no	140	172	326	154	44	13	45.75	25.78	25.82	21.93	NA	NA	1	1	1	1	1	1	1	1
BOR256	EBD31369M	EBD_CSIC	fieldtrip	2013-02-24	Hawkins_MTR	yes	2013	Kinabalu	Kinabalu	1538	2_Lower_montane	male	adult	adult	yes	no	133	183	327	144	42	15	45.20	25.93	25.15	20.71	NA	NA	1	1	1	1	1	1	1	1
BOR257	EBD31370M	EBD_CSIC	fieldtrip	2013-02-24	Hawkins_MTR	yes	2013	Kinabalu	Kinabalu	1593	2_Lower_montane	female	adult	adult	yes	no	151	188	336	148	42	14	43.90	25.34	24.30	20.63	NA	NA	1	1	1	1	1	1	1	1
BOR261	EBD31371M	EBD_CSIC	fieldtrip	2013-02-25	Hawkins_MTR	yes	2013	Kinabalu	Kinabalu	1538	2_Lower_montane	female	adult	adult	yes	no	131	171	335	151	44	14	44.43	25.52	24.87	20.82	NA	NA	1	1	1	1	1	1	1	1
BOR262	EBD31372M	EBD_CSIC	fieldtrip	2013-02-25	Hawkins_MTR	yes	2013	Kinabalu	Kinabalu	1538	2_Lower_montane	male	adult	adult	yes	no	136	185	318	133	44	13	46.01	27.44	25.60	21.50	NA	NA	1	1	1	1	1	1	1	1
BOR263	EBD31373M	EBD_CSIC	fieldtrip	2013-02-25	Hawkins_MTR	yes	2013	Kinabalu	Kinabalu	1538	2_Lower_montane	male	adult	adult	yes	no	148	184	327	143	44	15	46.60	27.30	25.79	21.84	NA	NA	1	1	1	1	1	1	1	1
BOR264	NA	EBD_CSIC	fieldtrip	2013-02-25	Hawkins_MTR	no	2013	Kinabalu	Kinabalu	1538	2_Lower_montane	female	adult	adult	no	no	130	168	306	138	38	12	NA	NA	NA	NA	NA	NA	0	0	0	0	0	1	1	0
BOR265	NA	EBD_CSIC	fieldtrip	2013-02-25	Hawkins_MTR	no	2013	Kinabalu	Kinabalu	1593	2_Lower_montane	female	juvenile	NOadult	no	no	144	178	298	120	45	13	NA	NA	NA	NA	NA	NA	0	0	0	0	0	0	0	0
BOR266	NA	EBD_CSIC	fieldtrip	2013-02-25	Hawkins_MTR	no	2013	Kinabalu	Kinabalu	1538	2_Lower_montane	male	juvenile	NOadult	no	no	125	NA	158	144	42	13	NA	NA	NA	NA	NA	NA	0	0	0	0	0	0	0	0
BOR267	NA	EBD_CSIC	fieldtrip	2013-02-26	Hawkins_MTR	no	2013	Kinabalu	Kinabalu	1593	2_Lower_montane	female	adult	adult	no	no	135	NA	NA	147	43	13	NA	NA	NA	NA	NA	NA	0	0	0	0	0	1	1	0
BOR269	NA	EBD_CSIC	fieldtrip	2013-02-26	Hawkins_MTR	no	2013	Kinabalu	Kinabalu	1538	2_Lower_montane	male	adult	adult	no	no	130	NA	NA	NA	NA	NA	NA	NA	NA	NA	NA	NA	0	0	0	0	0	1	0	0
BOR270	NA	EBD_CSIC	fieldtrip	2013-02-26	Hawkins_MTR	no	2013	Kinabalu	Kinabalu	1593	2_Lower_montane	female	adult	adult	no	no	141	180	338	158	43	14	NA	NA	NA	NA	NA	NA	0	0	0	0	0	1	1	0
BOR271	NA	EBD_CSIC	fieldtrip	2013-02-26	Hawkins_MTR	no	2013	Kinabalu	Kinabalu	1538	2_Lower_montane	female	adult	adult	no	no	115	165	313	148	43	13	NA	NA	NA	NA	NA	NA	0	0	0	0	0	1	1	0
BOR273	NA	EBD_CSIC	fieldtrip	2013-02-27	Hawkins_MTR	no	2013	Kinabalu	Kinabalu	1538	2_Lower_montane	female	adult	adult	no	no	165	NA	NA	147	43	14	NA	NA	NA	NA	NA	NA	0	0	0	0	0	1	1	0
BOR274	NA	EBD_CSIC	fieldtrip	2013-02-27	Hawkins_MTR	no	2013	Kinabalu	Kinabalu	1538	2_Lower_montane	male	adult	adult	no	no	145	155	315	160	42	14	NA	NA	NA	NA	NA	NA	0	0	0	0	0	1	1	0
BOR275	NA	EBD_CSIC	fieldtrip	2013-02-27	Hawkins_MTR	no	2013	Kinabalu	Kinabalu	1538	2_Lower_montane	female	pregnant	NA	no	no	190	167	305	138	42	13	NA	NA	NA	NA	NA	NA	0	0	0	0	0	0	0	0
BOR276	NA	EBD_CSIC	fieldtrip	2013-02-27	Hawkins_MTR	no	2013	Kinabalu	Kinabalu	1538	2_Lower_montane	male	adult	adult	no	no	158	NA	NA	NA	NA	13	NA	NA	NA	NA	NA	NA	0	0	0	0	0	1	0	0
BOR277	NA	EBD_CSIC	fieldtrip	2013-02-27	Hawkins_MTR	no	2013	Kinabalu	Kinabalu	1593	2_Lower_montane	male	adult	adult	no	no	162	172	327	155	39	13	NA	NA	NA	NA	NA	NA	0	0	0	0	0	1	1	0
BOR281	NA	EBD_CSIC	fieldtrip	2013-02-28	Hawkins_MTR	no	2013	Kinabalu	Kinabalu	1538	2_Lower_montane	female	juvenile	NOadult	no	no	98	144	276	132	43	13	NA	NA	NA	NA	NA	NA	0	0	0	0	0	0	0	0
BOR283	NA	EBD_CSIC	fieldtrip	2013-02-28	Hawkins_MTR	no	2013	Kinabalu	Kinabalu	1599	2_Lower_montane	male	adult	adult	no	no	172	168	315	147	45	13	NA	NA	NA	NA	NA	NA	0	0	0	0	0	1	1	0
BOR285	NA	EBD_CSIC	fieldtrip	2013-02-28	Hawkins_MTR	no	2013	Kinabalu	Kinabalu	1538	2_Lower_montane	female	juvenile	NOadult	no	no	100	148	281	133	43	12	NA	NA	NA	NA	NA	NA	0	0	0	0	0	0	0	0
BOR287	EBD31374M	EBD_CSIC	fieldtrip	2013-03-02	Hawkins_MTR	yes	2013	Kinabalu	Kinabalu	2265	3_Upper_montane	male	adult	adult	yes	no	132	170	320	150	44	14	43.45	25.70	24.24	19.97	NA	NA	1	1	1	1	1	1	1	1
BOR288	EBD31375M	EBD_CSIC	fieldtrip	2013-03-02	Hawkins_MTR	yes	2013	Kinabalu	Kinabalu	2264	3_Upper_montane	female	adult	adult	yes	no	134	189	321	132	43	15	42.84	25.45	23.64	19.50	NA	NA	1	1	1	1	1	1	1	1
BOR290	EBD31376M	EBD_CSIC	fieldtrip	2013-03-02	Hawkins_MTR	yes	2013	Kinabalu	Kinabalu	2254	3_Upper_montane	male	adult	adult	yes	no	126	164	314	134	45	14	44.85	25.73	25.04	20.57	NA	NA	1	1	1	1	1	1	1	1
BOR291	EBD31377M	EBD_CSIC	fieldtrip	2013-03-02	Hawkins_MTR	yes	2013	Kinabalu	Kinabalu	2268	3_Upper_montane	female	adult	adult	yes	no	138	175	304	129	42	13	43.45	25.62	24.44	20.10	NA	NA	1	1	1	1	1	1	1	1
BOR292	EBD31378M	EBD_CSIC	fieldtrip	2013-03-02	Hawkins_MTR	yes	2013	Kinabalu	Kinabalu	2268	3_Upper_montane	male	adult	adult	yes	no	126	169	315	146	44	16	44.32	25.88	23.85	19.51	NA	NA	1	1	1	1	1	1	1	1
BOR293	EBD31379M	EBD_CSIC	fieldtrip	2013-03-02	Hawkins_MTR	yes	2013	Kinabalu	Kinabalu	2254	3_Upper_montane	male	adult	adult	yes	no	128	192	330	138	46	15	44.17	25.30	24.63	20.12	NA	NA	1	1	1	1	1	1	1	1
BOR295	NA	EBD_CSIC	fieldtrip	2013-03-02	Hawkins_MTR	no	2013	Kinabalu	Kinabalu	2263	3_Upper_montane	male	adult	adult	no	no	134	176	319	143	44	13	NA	NA	NA	NA	NA	NA	0	0	0	0	0	1	1	0
BOR296	NA	EBD_CSIC	fieldtrip	2013-03-02	Hawkins_MTR	no	2013	Kinabalu	Kinabalu	2268	3_Upper_montane	male	adult	adult	no	no	140	NA	144	134	42	11	NA	NA	NA	NA	NA	NA	0	0	0	0	0	1	1	0
BOR297	NA	EBD_CSIC	fieldtrip	2013-03-02	Hawkins_MTR	no	2013	Kinabalu	Kinabalu	2268	3_Upper_montane	male	adult	adult	no	no	120	168	300	132	42	12	NA	NA	NA	NA	NA	NA	0	0	0	0	0	1	1	0
BOR300	NA	EBD_CSIC	fieldtrip	2013-03-03	Hawkins_MTR	no	2013	Kinabalu	Kinabalu	2263	3_Upper_montane	female	adult	adult	no	no	138	158	306	148	41	13	NA	NA	NA	NA	NA	NA	0	0	0	0	0	1	1	0
BOR301	NA	EBD_CSIC	fieldtrip	2013-03-03	Hawkins_MTR	no	2013	Kinabalu	Kinabalu	2263	3_Upper_montane	male	adult	adult	no	no	144	174	317	143	45	13	NA	NA	NA	NA	NA	NA	0	0	0	0	0	1	1	0
BOR302	NA	EBD_CSIC	fieldtrip	2013-03-03	Hawkins_MTR	no	2013	Kinabalu	Kinabalu	2264	3_Upper_montane	male	adult	adult	no	no	130	172	334	162	46	14	NA	NA	NA	NA	NA	NA	0	0	0	0	0	1	1	0
BOR303	NA	EBD_CSIC	fieldtrip	2013-03-03	Hawkins_MTR	no	2013	Kinabalu	Kinabalu	2259	3_Upper_montane	female	juvenile	NOadult	no	no	55	NA	128	110	37	10	NA	NA	NA	NA	NA	NA	0	0	0	0	0	0	0	0
BOR305	NA	EBD_CSIC	fieldtrip	2013-03-04	Hawkins_MTR	no	2013	Kinabalu	Kinabalu	2265	3_Upper_montane	male	adult	adult	no	no	110	164	290	126	41	13	NA	NA	NA	NA	NA	NA	0	0	0	0	0	1	1	0
BOR306	NA	EBD_CSIC	fieldtrip	2013-03-04	Hawkins_MTR	no	2013	Kinabalu	Kinabalu	2254	3_Upper_montane	male	adult	adult	no	no	104	164	306	142	44	13	NA	NA	NA	NA	NA	NA	0	0	0	0	0	1	1	0
BOR315	NA	EBD_CSIC	fieldtrip	2013-03-06	Hawkins_MTR	no	2013	Kinabalu	Kinabalu	2263	3_Upper_montane	female	adult	adult	no	no	104	153	303	150	46	13	NA	NA	NA	NA	NA	NA	0	0	0	0	0	1	1	0
BOR316	NA	EBD_CSIC	fieldtrip	2013-03-06	Hawkins_MTR	no	2013	Kinabalu	Kinabalu	2263	3_Upper_montane	female	adult	adult	no	no	112	164	315	151	38	13	NA	NA	NA	NA	NA	NA	0	0	0	0	0	1	1	0
BOR317	NA	EBD_CSIC	fieldtrip	2013-03-06	Hawkins_MTR	no	2013	Kinabalu	Kinabalu	2265	3_Upper_montane	female	juvenile	NOadult	no	no	72	138	251	113	38	11	NA	NA	NA	NA	NA	NA	0	0	0	0	0	0	0	0
BOR318	NA	EBD_CSIC	fieldtrip	2013-03-06	Hawkins_MTR	no	2013	Kinabalu	Kinabalu	2250	3_Upper_montane	female	adult	adult	no	no	150	156	292	136	43	13	NA	NA	NA	NA	NA	NA	0	0	0	0	0	1	1	0
BOR320	NA	EBD_CSIC	fieldtrip	2013-03-08	Hawkins_MTR	no	2013	Kinabalu	Kinabalu	2268	3_Upper_montane	female	adult	adult	no	no	182	142	282	140	43	13	NA	NA	NA	NA	NA	NA	0	0	0	0	0	1	1	0
BOR322	EBD31380M	EBD_CSIC	fieldtrip	2013-03-09	Hawkins_MTR	yes	2013	Kinabalu	Kinabalu	2683	3_Upper_montane	female	adult	adult	yes	no	132	186	306	120	45	16	45.50	26.68	25.59	22.17	NA	NA	1	1	1	1	1	1	1	1
BOR323	EBD31381M	EBD_CSIC	fieldtrip	2013-03-09	Hawkins_MTR	yes	2013	Kinabalu	Kinabalu	2696	3_Upper_montane	female	adult	adult	yes	no	150	177	298	121	47	14	44.47	26.98	24.09	20.40	NA	NA	1	1	1	1	1	1	1	1
BOR324	EBD31382M	EBD_CSIC	fieldtrip	2013-03-09	Hawkins_MTR	yes	2013	Kinabalu	Kinabalu	2636	3_Upper_montane	male	adult	adult	yes	no	150	184	330	146	46	15	46.07	28.00	26.05	21.63	NA	NA	1	1	1	1	1	1	1	1
BOR327	EBD31383M	EBD_CSIC	fieldtrip	2013-03-09	Hawkins_MTR	yes	2013	Kinabalu	Kinabalu	2701	3_Upper_montane	female	adult	adult	no	no	162	187	333	146	43	15	NA	NA	NA	NA	NA	NA	0	0	0	0	0	1	1	0
BOR329	EBD31384M	EBD_CSIC	fieldtrip	2013-03-09	Hawkins_MTR	yes	2013	Kinabalu	Kinabalu	2683	3_Upper_montane	female	adult	adult	yes	no	124	178	314	136	45	14	43.03	25.41	23.72	19.18	NA	NA	1	1	1	1	1	1	1	1
BOR330	EBD31385M	EBD_CSIC	fieldtrip	2013-03-09	Hawkins_MTR	yes	2013	Kinabalu	Kinabalu	2670	3_Upper_montane	male	adult	adult	yes	no	148	195	333	138	47	14	45.81	26.96	25.40	21.24	NA	NA	1	1	1	1	1	1	1	1
BOR331	NA	EBD_CSIC	fieldtrip	2013-03-09	Hawkins_MTR	no	2013	Kinabalu	Kinabalu	2670	3_Upper_montane	male	adult	adult	no	no	130	168	316	148	43	15	NA	NA	NA	NA	NA	NA	0	0	0	0	0	1	1	0
BOR332	NA	EBD_CSIC	fieldtrip	2013-03-09	Hawkins_MTR	no	2013	Kinabalu	Kinabalu	2745	3_Upper_montane	female	adult	adult	no	no	140	165	323	158	42	13	NA	NA	NA	NA	NA	NA	0	0	0	0	0	1	1	0
BOR333	NA	EBD_CSIC	fieldtrip	2013-03-09	Hawkins_MTR	no	2013	Kinabalu	Kinabalu	2757	3_Upper_montane	female	adult	adult	no	no	116	155	293	138	40	12	NA	NA	NA	NA	NA	NA	0	0	0	0	0	1	1	0
BOR334	NA	EBD_CSIC	fieldtrip	2013-03-09	Hawkins_MTR	no	2013	Kinabalu	Kinabalu	2749	3_Upper_montane	male	adult	adult	no	no	NA	160	304	144	44	14	NA	NA	NA	NA	NA	NA	0	0	0	0	0	1	1	0
BOR337	NA	EBD_CSIC	fieldtrip	2013-03-09	Hawkins_MTR	no	2013	Kinabalu	Kinabalu	2701	3_Upper_montane	female	adult	adult	no	no	146	155	293	138	42	13	NA	NA	NA	NA	NA	NA	0	0	0	0	0	1	1	0
BOR338	NA	EBD_CSIC	fieldtrip	2013-03-09	Hawkins_MTR	no	2013	Kinabalu	Kinabalu	2683	3_Upper_montane	male	adult	adult	no	no	154	164	320	156	42	13	NA	NA	NA	NA	NA	NA	0	0	0	0	0	1	1	0
BOR339	NA	EBD_CSIC	fieldtrip	2013-03-09	Hawkins_MTR	no	2013	Kinabalu	Kinabalu	2682	3_Upper_montane	female	juvenile	NOadult	no	no	126	142	284	142	38	12	NA	NA	NA	NA	NA	NA	0	0	0	0	0	0	0	0
BOR341	NA	EBD_CSIC	fieldtrip	2013-03-09	Hawkins_MTR	no	2013	Kinabalu	Kinabalu	2672	3_Upper_montane	female	juvenile	NOadult	no	no	156	160	298	138	37	12	NA	NA	NA	NA	NA	NA	0	0	0	0	0	0	0	0
BOR345	NA	EBD_CSIC	fieldtrip	2013-03-10	Hawkins_MTR	no	2013	Kinabalu	Kinabalu	2752	3_Upper_montane	female	adult	adult	no	no	134	163	301	138	43	13	NA	NA	NA	NA	NA	NA	0	0	0	0	0	1	1	0
BOR346	NA	EBD_CSIC	fieldtrip	2013-03-10	Hawkins_MTR	no	2013	Kinabalu	Kinabalu	2740	3_Upper_montane	male	adult	adult	no	no	130	148	274	126	42	12	NA	NA	NA	NA	NA	NA	0	0	0	0	0	1	1	0
BOR349	NA	EBD_CSIC	fieldtrip	2013-03-10	Hawkins_MTR	no	2013	Kinabalu	Kinabalu	2730	3_Upper_montane	male	juvenile	NOadult	no	no	120	138	279	141	38	11	NA	NA	NA	NA	NA	NA	0	0	0	0	0	0	0	0
BOR355	NA	EBD_CSIC	fieldtrip	2013-03-11	Hawkins_MTR	no	2013	Kinabalu	Kinabalu	2701	3_Upper_montane	male	juvenile	NOadult	no	no	66	124	249	125	41	12	NA	NA	NA	NA	NA	NA	0	0	0	0	0	0	0	0
BOR357	NA	EBD_CSIC	fieldtrip	2013-03-11	Hawkins_MTR	no	2013	Kinabalu	Kinabalu	2685	3_Upper_montane	male	adult	adult	no	no	130	140	277	137	41	11	NA	NA	NA	NA	NA	NA	0	0	0	0	0	1	1	0
BOR360	NA	EBD_CSIC	fieldtrip	2013-03-11	Hawkins_MTR	no	2013	Kinabalu	Kinabalu	2757	3_Upper_montane	female	adult	adult	no	no	126	NA	157	142	44	13	NA	NA	NA	NA	NA	NA	0	0	0	0	0	1	1	0
BOR363	NA	EBD_CSIC	fieldtrip	2013-03-12	Hawkins_MTR	no	2013	Kinabalu	Kinabalu	2701	3_Upper_montane	female	adult	adult	no	no	156	167	315	148	40	13	NA	NA	NA	NA	NA	NA	0	0	0	0	0	1	1	0
BOR365	NA	EBD_CSIC	fieldtrip	2013-03-12	Hawkins_MTR	no	2013	Kinabalu	Kinabalu	2670	3_Upper_montane	male	adult	adult	no	no	154	157	307	150	44	12	NA	NA	NA	NA	NA	NA	0	0	0	0	0	1	1	0
BOR368	NA	EBD_CSIC	fieldtrip	2013-03-12	Hawkins_MTR	no	2013	Kinabalu	Kinabalu	2759	3_Upper_montane	female	adult	adult	no	no	136	153	293	140	44	12	NA	NA	NA	NA	NA	NA	0	0	0	0	0	1	1	0
BOR371	NA	EBD_CSIC	fieldtrip	2013-03-12	Hawkins_MTR	no	2013	Kinabalu	Kinabalu	2701	3_Upper_montane	female	juvenile	NOadult	no	no	62	127	255	128	38	10	NA	NA	NA	NA	NA	NA	0	0	0	0	0	0	0	0
BOR380	NA	EBD_CSIC	fieldtrip	2013-03-13	Hawkins_MTR	no	2013	Kinabalu	Kinabalu	2672	3_Upper_montane	male	adult	adult	no	no	124	154	294	140	44	11	NA	NA	NA	NA	NA	NA	0	0	0	0	0	1	1	0
BOR386	NA	EBD_CSIC	fieldtrip	2013-03-15	Hawkins_MTR	yes	2013	Kinabalu	Kinabalu	3317	4_Subalpine	female	adult	adult	yes	no	104	171	322	151	44	13	NA	NA	NA	NA	NA	NA	1	1	1	1	1	1	1	0
BOR387	EBD31386M	EBD_CSIC	fieldtrip	2013-03-15	Hawkins_MTR	yes	2013	Kinabalu	Kinabalu	3352	4_Subalpine	male	adult	adult	yes	no	138	NA	NA	NA	NA	NA	44.96	26.98	25.11	20.65	NA	NA	1	0	0	0	0	1	0	1
BOR389	EBD31387M	EBD_CSIC	fieldtrip	2013-03-15	Hawkins_MTR	yes	2013	Kinabalu	Kinabalu	3222	4_Subalpine	female	adult	adult	yes	no	160	195	336	141	49	15	44.85	26.10	24.92	21.20	NA	NA	1	1	1	1	1	1	1	1
BOR390	EBD31388M	EBD_CSIC	fieldtrip	2013-03-16	Hawkins_MTR	yes	2013	Kinabalu	Kinabalu	3382	4_Subalpine	male	adult	adult	yes	no	130	183	331	148	50	14	45.28	26.20	25.33	21.28	NA	NA	1	1	1	1	1	1	1	1
BOR395	EBD31389M	EBD_CSIC	fieldtrip	2013-03-16	Hawkins_MTR	yes	2013	Kinabalu	Kinabalu	3367	4_Subalpine	female	adult	adult	yes	no	152	192	302	110	44	14	43.15	24.53	23.87	19.72	NA	NA	1	1	1	1	1	1	1	1
BOR396	EBD31390M	EBD_CSIC	fieldtrip	2013-03-16	Hawkins_MTR	yes	2013	Kinabalu	Kinabalu	3235	4_Subalpine	male	adult	adult	yes	no	150	185	335	150	46	14	44.28	26.27	24.53	19.90	NA	NA	1	1	1	1	1	1	1	1
BOR404	NA	EBD_CSIC	fieldtrip	2013-03-18	Hawkins_MTR	no	2013	Kinabalu	Kinabalu	3367	4_Subalpine	male	adult	adult	no	no	132	NA	157	153	43	12	NA	NA	NA	NA	NA	NA	0	0	0	0	0	1	1	0
BOR429	EBD31391M	EBD_CSIC	fieldtrip	2013-03-25	Camacho-Sanchez_M	yes	2013	Kinabalu	Poring	944	1_Lowland	male	adult	adult	yes	no	156	193	355	162	40	16	44.87	26.38	24.90	21.15	NA	NA	1	1	1	0	0	1	0	1
BOR441	EBD31392M	EBD_CSIC	fieldtrip	2013-03-26	Camacho-Sanchez_M	yes	2013	Kinabalu	Poring	983	1_Lowland	female	adult	adult	yes	no	138	174	320	146	37	15.5	46.39	24.80	26.00	21.71	NA	NA	1	1	1	0	0	1	0	1
BOR450	EBD31393M	EBD_CSIC	fieldtrip	2013-03-27	Camacho-Sanchez_M	yes	2013	Kinabalu	Poring	992	1_Lowland	male	adult	adult	yes	no	143	175	340	165	38	17	46.44	26.24	25.76	21.63	NA	NA	1	1	1	0	0	1	0	1
BOR451	EBD31394M	EBD_CSIC	fieldtrip	2013-03-27	Camacho-Sanchez_M	yes	2013	Kinabalu	Poring	983	1_Lowland	male	adult	adult	yes	no	140	172	332	160	38	15.5	44.29	25.80	24.80	19.93	NA	NA	1	1	1	0	0	1	0	1
BOR452	NA	EBD_CSIC	fieldtrip	2013-03-27	Camacho-Sanchez_M	no	2013	Kinabalu	Poring	945	1_Lowland	female	adult	adult	no	no	141	NA	NA	160	36	16	NA	NA	NA	NA	NA	NA	0	0	0	0	0	1	0	0
BOR457	NA	EBD_CSIC	fieldtrip	2013-03-28	Camacho-Sanchez_M	no	2013	Kinabalu	Poring	992	1_Lowland	female	adult	adult	no	no	165	NA	NA	158	27	15	NA	NA	NA	NA	NA	NA	0	0	0	0	0	1	0	0
BOR461	EBD31395M	EBD_CSIC	fieldtrip	2013-03-29	Camacho-Sanchez_M	yes	2013	Kinabalu	Poring	973	1_Lowland	male	young	adult	yes	no	113	175	323	148	35	15	46.04	26.48	26.36	22.54	NA	NA	1	1	1	0	0	1	0	1
BOR462	EBD31396M	EBD_CSIC	fieldtrip	2013-03-29	Camacho-Sanchez_M	yes	2013	Kinabalu	Poring	983	1_Lowland	female	adult	adult	yes	no	116	178	333	155	36	14.5	44.78	24.93	24.10	20.86	NA	NA	1	1	1	0	0	1	0	1
BOR501	EBD31397M	EBD_CSIC	fieldtrip	2013-02-28	Camacho-Sanchez_M	yes	2013	Tambuyukon	Tambuyukon	2111	3_Upper_montane	female	adult	adult	yes	no	120	175	330	155	37	14	44.70	26.06	25.03	20.54	NA	NA	1	1	1	0	0	1	0	1
BOR503	NA	EBD_CSIC	fieldtrip	2013-03-01	Camacho-Sanchez_M	no	2013	Tambuyukon	Tambuyukon	2086	3_Upper_montane	male	adult	adult	no	no	132	NA	NA	152	35.8	13.6	NA	NA	NA	NA	NA	NA	0	0	0	0	0	1	0	0
BOR506	EBD31398M	EBD_CSIC	fieldtrip	2013-03-02	Camacho-Sanchez_M	no	2013	Tambuyukon	Tambuyukon	2051	3_Upper_montane	female	NA	NA	no	no	138	NA	NA	147	35	13	NA	NA	NA	NA	NA	NA	0	0	0	0	0	0	0	0
BOR511	EBD31399M	EBD_CSIC	fieldtrip	2013-03-02	Camacho-Sanchez_M	no	2013	Tambuyukon	Tambuyukon	2029	3_Upper_montane	male	adult	adult	no	no	123	NA	NA	132	36	NA	NA	NA	NA	NA	NA	NA	0	0	0	0	0	1	0	0
BOR513	EBD31400M	EBD_CSIC	fieldtrip	2013-03-02	Camacho-Sanchez_M	yes	2013	Tambuyukon	Tambuyukon	2154	3_Upper_montane	male	adult	adult	yes	no	125	158	308	150	37	NA	43.25	26.95	23.81	20.06	NA	NA	1	1	1	0	0	1	0	1
BOR517	NA	EBD_CSIC	fieldtrip	2013-03-02	Camacho-Sanchez_M	no	2013	Tambuyukon	Tambuyukon	2111	3_Upper_montane	female	adult	adult	no	no	105	NA	NA	135	36	14	NA	NA	NA	NA	NA	NA	0	0	0	0	0	1	0	0
BOR518	NA	EBD_CSIC	fieldtrip	2013-03-03	Camacho-Sanchez_M	no	2013	Tambuyukon	Tambuyukon	2154	3_Upper_montane	male	adult	adult	no	no	138	NA	NA	140	38	14	NA	NA	NA	NA	NA	NA	0	0	0	0	0	1	0	0
BOR521	NA	EBD_CSIC	fieldtrip	2013-03-04	Camacho-Sanchez_M	no	2013	Tambuyukon	Tambuyukon	2154	3_Upper_montane	female	adult	adult	no	no	145	NA	NA	152	35	14	NA	NA	NA	NA	NA	NA	0	0	0	0	0	1	0	0
BOR525	NA	EBD_CSIC	fieldtrip	2013-03-05	Camacho-Sanchez_M	no	2013	Tambuyukon	Tambuyukon	2050	3_Upper_montane	female	adult	adult	no	no	118	NA	NA	145	38	NA	NA	NA	NA	NA	NA	NA	0	0	0	0	0	1	0	0
BOR527	EBD31401M	EBD_CSIC	fieldtrip	2013-03-05	Camacho-Sanchez_M	yes	2013	Tambuyukon	Tambuyukon	2257	3_Upper_montane	female	adult	adult	yes	no	118	172	305	133	36	14.5	44.49	25.48	24.50	20.76	NA	NA	1	1	1	0	0	1	0	1
BOR530	EBD31402M	EBD_CSIC	fieldtrip	2013-03-05	Camacho-Sanchez_M	yes	2013	Tambuyukon	Tambuyukon	2274	3_Upper_montane	male	adult	adult	yes	no	121	170	321	151	37	17	44.73	26.54	24.80	20.60	NA	NA	1	1	1	0	0	1	0	1
BOR536	EBD31403M	EBD_CSIC	fieldtrip	2013-03-06	Camacho-Sanchez_M	yes	2013	Tambuyukon	Tambuyukon	2349	3_Upper_montane	female	adult	adult	yes	no	123	NA	NA	140	36	17	44.00	26.61	24.87	20.05	NA	NA	1	0	1	0	0	1	0	1
BOR537	NA	EBD_CSIC	fieldtrip	2013-03-06	Camacho-Sanchez_M	no	2013	Tambuyukon	Tambuyukon	2363	3_Upper_montane	male	adult	adult	no	no	120	NA	NA	140	36	NA	NA	NA	NA	NA	NA	NA	0	0	0	0	0	1	0	0
BOR538	NA	EBD_CSIC	fieldtrip	2013-03-06	Camacho-Sanchez_M	no	2013	Tambuyukon	Tambuyukon	2344	3_Upper_montane	male	adult	adult	no	no	110	NA	NA	145	37	NA	NA	NA	NA	NA	NA	NA	0	0	0	0	0	1	0	0
BOR539	NA	EBD_CSIC	fieldtrip	2013-03-06	Camacho-Sanchez_M	no	2013	Tambuyukon	Tambuyukon	2274	3_Upper_montane	female	adult	adult	no	no	142	NA	NA	148	37	NA	NA	NA	NA	NA	NA	NA	0	0	0	0	0	1	0	0
BOR542	NA	EBD_CSIC	fieldtrip	2013-03-07	Camacho-Sanchez_M	no	2013	Tambuyukon	Tambuyukon	2274	3_Upper_montane	female	adult	adult	no	no	105	NA	NA	144	35	NA	NA	NA	NA	NA	NA	NA	0	0	0	0	0	1	0	0
BOR545	NA	EBD_CSIC	fieldtrip	2013-03-07	Camacho-Sanchez_M	no	2013	Tambuyukon	Tambuyukon	2344	3_Upper_montane	male	adult	adult	no	no	113	NA	NA	143	36	17	NA	NA	NA	NA	NA	NA	0	0	0	0	0	1	0	0
BOR546	NA	EBD_CSIC	fieldtrip	2013-03-07	Camacho-Sanchez_M	no	2013	Tambuyukon	Tambuyukon	2363	3_Upper_montane	female	NA	NA	no	no	107	NA	NA	134	34	14	NA	NA	NA	NA	NA	NA	0	0	0	0	0	0	0	0
BOR549	NA	EBD_CSIC	fieldtrip	2013-03-08	Camacho-Sanchez_M	no	2013	Tambuyukon	Tambuyukon	2305	3_Upper_montane	female	adult	adult	no	no	101	NA	NA	143	33	14	NA	NA	NA	NA	NA	NA	0	0	0	0	0	1	0	0
BOR550	NA	EBD_CSIC	fieldtrip	2013-03-08	Camacho-Sanchez_M	no	2013	Tambuyukon	Tambuyukon	2274	3_Upper_montane	male	adult	adult	no	no	103	NA	NA	144	36	16	NA	NA	NA	NA	NA	NA	0	0	0	0	0	1	0	0
BOR551	NA	EBD_CSIC	fieldtrip	2013-03-08	Camacho-Sanchez_M	no	2013	Tambuyukon	Tambuyukon	2344	3_Upper_montane	NA	NA	NA	no	no	111	NA	NA	143	37	NA	NA	NA	NA	NA	NA	NA	0	0	0	0	0	0	0	0
BOR552	NA	EBD_CSIC	fieldtrip	2013-03-08	Camacho-Sanchez_M	no	2013	Tambuyukon	Tambuyukon	2274	3_Upper_montane	male	adult	adult	no	no	119	NA	NA	137	38	NA	NA	NA	NA	NA	NA	NA	0	0	0	0	0	1	0	0
BOR553	NA	EBD_CSIC	fieldtrip	2013-03-08	Camacho-Sanchez_M	no	2013	Tambuyukon	Tambuyukon	2240	3_Upper_montane	female	NA	NA	no	no	102	NA	NA	145	37	NA	NA	NA	NA	NA	NA	NA	0	0	0	0	0	0	0	0
BOR555	EBD31404M	EBD_CSIC	fieldtrip	2013-03-09	Camacho-Sanchez_M	yes	2013	Tambuyukon	Tambuyukon	2344	3_Upper_montane	female	NA	NA	no	no	102	159	303	144	36	16	NA	NA	NA	NA	NA	NA	0	0	0	0	0	0	0	0
BOR558	NA	EBD_CSIC	fieldtrip	2013-03-09	Camacho-Sanchez_M	no	2013	Tambuyukon	Tambuyukon	2257	3_Upper_montane	female	juvenile	NOadult	no	no	109	NA	NA	135	35	16	NA	NA	NA	NA	NA	NA	0	0	0	0	0	0	0	0
BOR560	NA	EBD_CSIC	fieldtrip	2013-03-10	Camacho-Sanchez_M	no	2013	Tambuyukon	Tambuyukon	2291	3_Upper_montane	female	adult	adult	no	no	112	NA	NA	147	37	NA	NA	NA	NA	NA	NA	NA	0	0	0	0	0	1	0	0
BOR607	EBD31405M	EBD_CSIC	fieldtrip	2016-06-26	Camacho-Sanchez_M	yes	2016	CrockerRange	Gunung_Alap	1850	2_Lower_montane	NA	NA	adult	no	no	87	163	303	140	36	11.5	NA	NA	NA	NA	NA	NA	0	0	0	0	0	1	0	0
BOR613	EBD31406M	EBD_CSIC	fieldtrip	2016-07-02	Camacho-Sanchez_M	yes	2016	CrockerRange	Gunung_Alap	1800	2_Lower_montane	female	NA	adult	no	no	NA	170	310	140	39	13	NA	NA	NA	NA	NA	NA	0	0	0	0	0	1	0	0
BOR661	EBD31411M	EBD_CSIC	fieldtrip	2016-07-15	Hinckley_A	yes	2016	TrusMadi	Mountain_summit	2600	3_Upper_montane	male	NA	adult	yes	no	123	173	323	150	41	16	47.11	27.39	26.31	22.14	NA	NA	1	1	1	0	0	1	0	1
BOR665	EBD31412M	EBD_CSIC	fieldtrip	2016-07-15	Camacho-Sanchez_M	yes	2016	TrusMadi	Mountain_summit	2600	3_Upper_montane	male	NA	adult	yes	no	122	162	294	132	38	9.5	43.06	26.44	24.17	19.17	NA	NA	1	1	1	0	0	1	0	1
BOR673	EBD31413M	EBD_CSIC	fieldtrip	2016-07-23	Camacho-Sanchez_M	yes	2016	TrusMadi	Mirad_Irad	900	1_Lowland	male	NA	adult	yes	no	129	177	337	160	39	15	46.25	26.05	26.05	21.21	NA	NA	1	1	1	0	0	1	0	1
BOR692	EBD31414M	EBD_CSIC	fieldtrip	2016-07-28	Camacho-Sanchez_M	yes	2016	TrusMadi	Mirad_Irad	900	1_Lowland	female	NA	NA	no	no	NA	167	329	162	37	13	43.77	23.72	24.72	20.77	NA	NA	0	0	0	0	0	0	0	1
FMNH108823	FMNH108823	FMNH	collection	1965-12-02	NA	yes	1965	Kinabalu	NA	1646	2_Lower_montane	female	2_embrios/5g	adult	no	yes	143	173	308	135	39	15	NA	NA	NA	NA	NA	NA	0	0	0	0	0	0	0	0
FMNH108824	FMNH108824	FMNH	collection	1965-12-02	NA	yes	1965	Kinabalu	NA	1646	2_Lower_montane	male	NA	adult	no	yes	115	176	318	142	39	17	NA	NA	NA	NA	NA	NA	1	0	0	0	0	1	1	0
FMNH108825	FMNH108825	FMNH	collection	1965-12-02	NA	yes	1965	Kinabalu	NA	1646	2_Lower_montane	male	NA	adult	no	yes	130	178	324	146	41	16	NA	NA	NA	NA	NA	NA	1	0	0	0	0	1	1	0
FMNH108826	FMNH108826	FMNH	collection	1965-12-02	NA	yes	1965	Kinabalu	NA	1646	2_Lower_montane	male	NA	adult	no	yes	120	170	348	138	39	15	NA	NA	NA	NA	NA	NA	1	0	0	0	0	1	1	0
FMNH108827	FMNH108827	FMNH	collection	1965-12-03	NA	yes	1965	Kinabalu	NA	1646	2_Lower_montane	male	NA	adult	no	yes	100	165	300	135	38	16	NA	NA	NA	NA	NA	NA	1	0	0	0	0	1	1	0
FMNH108828	FMNH108828	FMNH	collection	1965-12-03	NA	yes	1965	Kinabalu	NA	1646	2_Lower_montane	female	NA	adult	no	yes	98	158	298	140	39	15	NA	NA	NA	NA	NA	NA	1	0	0	0	0	1	1	0
FMNH108829	FMNH108829	FMNH	collection	1965-12-03	NA	yes	1965	Kinabalu	NA	1646	2_Lower_montane	female	2_embrios/9g	adult	no	yes	120	167	309	142	39	16	NA	NA	NA	NA	NA	NA	0	0	0	0	0	0	0	0
FMNH108830	FMNH108830	FMNH	collection	1965-12-05	NA	yes	1965	Kinabalu	NA	1646	2_Lower_montane	female	NA	adult	no	yes	125	170	320	150	40	15	NA	NA	NA	NA	NA	NA	1	0	0	0	0	1	1	0
FMNH108831	FMNH108831	FMNH	collection	1965-12-05	NA	yes	1965	Kinabalu	NA	2146	3_Upper_montane	female	NA	adult	no	yes	135	165	305	140	38	16	NA	NA	NA	NA	NA	NA	1	0	0	0	0	1	1	0
FMNH108832	FMNH108832	FMNH	collection	1965-12-05	NA	yes	1965	Kinabalu	NA	2146	3_Upper_montane	male	NA	adult	no	yes	95	158	298	140	38	16	NA	NA	NA	NA	NA	NA	1	0	0	0	0	1	1	0
FMNH108833	FMNH108833	FMNH	collection	1965-12-06	NA	yes	1965	Kinabalu	NA	1646	2_Lower_montane	male	NA	adult	no	yes	117	163	300	135	36	15	NA	NA	NA	NA	NA	NA	1	0	0	0	0	1	1	0
FMNH108834	FMNH108834	FMNH	collection	1965-12-07	NA	yes	1965	Kinabalu	NA	1646	2_Lower_montane	male	NA	NOadult	no	yes	57	132	255	123	37	14	NA	NA	NA	NA	NA	NA	0	0	0	0	0	0	0	0
FMNH108835	FMNH108835	FMNH	collection	1965-12-07	NA	yes	1965	Kinabalu	NA	2146	3_Upper_montane	male	NA	adult	no	yes	107	158	308	150	39	16	NA	NA	NA	NA	NA	NA	1	0	0	0	0	1	1	0
FMNH108836	FMNH108836	FMNH	collection	1965-12-07	NA	yes	1965	Kinabalu	NA	2146	3_Upper_montane	female	NA	adult	no	yes	110	165	305	140	37	15	NA	NA	NA	NA	NA	NA	1	0	0	0	0	1	1	0
FMNH108837	FMNH108837	FMNH	collection	1965-12-07	NA	yes	1965	Kinabalu	NA	2146	3_Upper_montane	male	NA	NOadult	no	yes	117	165	301	136	39	16	NA	NA	NA	NA	NA	NA	0	0	0	0	0	0	0	0
FMNH108838	FMNH108838	FMNH	collection	1965-12-08	NA	yes	1965	Kinabalu	NA	1646	2_Lower_montane	female	NA	adult	no	yes	110	162	312	150	40	15	NA	NA	NA	NA	NA	NA	1	0	0	0	0	1	1	0
FMNH108839	FMNH108839	FMNH	collection	1965-12-08	NA	yes	1965	Kinabalu	NA	1646	2_Lower_montane	female	2_embrios/15g	adult	no	yes	140	176	324	148	38	16	NA	NA	NA	NA	NA	NA	0	0	0	0	0	0	0	0
FMNH108840	FMNH108840	FMNH	collection	1965-12-08	NA	yes	1965	Kinabalu	NA	2146	3_Upper_montane	female	NA	adult	no	yes	107	168	314	146	39	15	NA	NA	NA	NA	NA	NA	1	0	0	0	0	1	1	0
FMNH108841	FMNH108841	FMNH	collection	1965-12-09	NA	yes	1965	Kinabalu	NA	1646	2_Lower_montane	male	NA	adult	no	yes	110	169	304	135	37	16	NA	NA	NA	NA	NA	NA	1	0	0	0	0	1	1	0
FMNH108842	FMNH108842	FMNH	collection	1965-12-09	NA	yes	1965	Kinabalu	NA	2146	3_Upper_montane	female	NA	adult	no	yes	110	164	309	145	39	15	NA	NA	NA	NA	NA	NA	1	0	0	0	0	1	1	0
FMNH108843	FMNH108843	FMNH	collection	1965-12-15	NA	yes	1965	Kinabalu	NA	2652	3_Upper_montane	male	NA	adult	no	yes	115	168	296	128	40	15	NA	NA	NA	NA	NA	NA	1	0	0	0	0	1	1	0
FMNH108844	FMNH108844	FMNH	collection	1965-12-14	NA	yes	1965	Kinabalu	NA	1646	2_Lower_montane	male	NA	NOadult	no	yes	75	138	258	120	38	17	NA	NA	NA	NA	NA	NA	0	0	0	0	0	0	0	0
FMNH108845	FMNH108845	FMNH	collection	1965-12-15	NA	yes	1965	Kinabalu	NA	2652	3_Upper_montane	female	NA	adult	no	yes	135	167	321	154	38	17	NA	NA	NA	NA	NA	NA	1	0	0	0	0	1	1	0
FMNH108846	FMNH108846	FMNH	collection	1965-12-16	NA	yes	1965	Kinabalu	NA	1646	2_Lower_montane	female	NA	adult	no	yes	125	171	316	145	39	17	NA	NA	NA	NA	NA	NA	1	0	0	0	0	1	1	0
FMNH108847	FMNH108847	FMNH	collection	1965-12-16	NA	yes	1965	Kinabalu	NA	2652	3_Upper_montane	female	NA	adult	no	yes	135	168	310	142	40	15	NA	NA	NA	NA	NA	NA	1	0	0	0	0	1	1	0
FMNH108848	FMNH108848	FMNH	collection	1965-12-17	NA	yes	1965	Kinabalu	NA	1280	2_Lower_montane	male	NA	adult	no	yes	110	161	303	142	41	16	NA	NA	NA	NA	NA	NA	1	0	0	0	0	1	1	0
FMNH108849	FMNH108849	FMNH	collection	1965-12-17	NA	yes	1965	Kinabalu	NA	1280	2_Lower_montane	male	NA	adult	no	no	147	182	337	155	42	17	NA	NA	NA	NA	NA	NA	0	0	0	0	0	1	1	0
FMNH108850	FMNH108850	FMNH	collection	1965-12-18	NA	yes	1965	Kinabalu	NA	1280	2_Lower_montane	female	NA	NOadult	no	yes	70	140	271	131	38	14	NA	NA	NA	NA	NA	NA	0	0	0	0	0	0	0	0
FMNH108851	FMNH108851	FMNH	collection	1965-12-18	NA	yes	1965	Kinabalu	NA	2652	3_Upper_montane	female	2_embrios/10g	adult	no	yes	127	170	320	150	39	15	NA	NA	NA	NA	NA	NA	0	0	0	0	0	0	0	0
FMNH108852	FMNH108852	FMNH	collection	1965-12-20	NA	yes	1965	Kinabalu	NA	2652	3_Upper_montane	female	NA	NOadult	no	yes	110	166	196	130	35	15	NA	NA	NA	NA	NA	NA	0	0	0	0	0	0	0	0
FMNH108853	FMNH108853	FMNH	collection	1965-12-20	NA	yes	1965	Kinabalu	NA	2652	3_Upper_montane	female	NA	adult	no	yes	135	173	321	148	41	NA	NA	NA	NA	NA	NA	NA	1	0	0	0	0	1	1	0
FMNH49259	FMNH49259	FMNH	collection	1937-06-22	NA	yes	1937	Kinabalu	NA	1676	2_Lower_montane	female	NA	NA	no	no	NA	158	300	142	40	18	NA	NA	NA	NA	NA	NA	0	0	0	0	0	0	0	0
FMNH49260	FMNH49260	FMNH	collection	1937-07-28	NA	yes	1937	Kinabalu	NA	1676	2_Lower_montane	male	NA	NA	no	no	NA	148	299	151	45	17	NA	NA	NA	NA	NA	NA	0	0	0	0	0	0	0	0
MCZ36128	MCZ36128	MCZ	collection	1937-07-09	NA	yes	1937	Kinabalu	NA	2133	3_Upper_montane	female	NA	adult	yes	no	NA	165	304	139	39	14	NA	NA	NA	NA	NA	NA	0	0	0	0	0	1	1	0
MCZ36129	MCZ36129	MCZ	collection	1937-06-19	NA	yes	1937	Kinabalu	NA	1676	2_Lower_montane	female	NA	adult	yes	no	NA	NA	310	NA	NA	17	NA	NA	NA	NA	NA	NA	0	0	0	0	0	1	0	0
MCZ36130	MCZ36130	MCZ	collection	1937-06-17	NA	yes	1937	Kinabalu	NA	1676	2_Lower_montane	female	NA	NOadult	yes	no	NA	NA	300	NA	37	15	NA	NA	NA	NA	NA	NA	0	0	0	0	0	0	0	0
MCZ36131	MCZ36131	MCZ	collection	1937-06-09	NA	yes	1937	Kinabalu	NA	1676	2_Lower_montane	female	NA	adult	yes	no	NA	NA	305	NA	NA	17	NA	NA	NA	NA	NA	NA	0	0	0	0	0	1	0	0
MCZ36132	MCZ36132	MCZ	collection	1937-06-24	NA	yes	1937	Kinabalu	NA	1676	2_Lower_montane	male	NA	adult	yes	no	NA	NA	319	NA	39	16	NA	NA	NA	NA	NA	NA	0	0	0	0	0	1	1	0
MCZ36136	MCZ36136	MCZ	collection	1937-07-13	NA	yes	1937	Kinabalu	NA	2133	3_Upper_montane	male	NA	adult	yes	no	NA	156	306	150	39	16	NA	NA	NA	NA	NA	NA	0	0	0	0	0	1	1	0
MCZ36138	MCZ36138	MCZ	collection	1937-07-17	NA	yes	1937	Kinabalu	NA	2133	3_Upper_montane	male	NA	adult	yes	no	NA	164	299	135	34	19	NA	NA	NA	NA	NA	NA	0	0	0	0	0	1	1	0
MCZ36139	MCZ36139	MCZ	collection	1937-07-06	NA	yes	1937	Kinabalu	NA	2133	3_Upper_montane	male	NA	adult	yes	no	NA	166	310	144	38	14	NA	NA	NA	NA	NA	NA	0	0	0	0	0	1	1	0
MCZ36140	MCZ36140	MCZ	collection	1937-07-08	NA	yes	1937	Kinabalu	NA	2133	3_Upper_montane	male	NA	adult	yes	no	NA	180	330	150	40	15	NA	NA	NA	NA	NA	NA	0	0	0	0	0	1	1	0
MCZ36141	MCZ36141	MCZ	collection	1937-07-17	NA	yes	1937	Kinabalu	NA	2133	3_Upper_montane	female	NA	adult	yes	no	NA	173	318	145	40	14	NA	NA	NA	NA	NA	NA	0	0	0	0	0	1	1	0
MCZ36142	MCZ36142	MCZ	collection	1937-07-05	NA	yes	1937	Kinabalu	NA	1280	2_Lower_montane	female	NA	NOadult	yes	no	NA	171	309	138	35	15	NA	NA	NA	NA	NA	NA	0	0	0	0	0	0	0	0
MCZ36143	MCZ36143	MCZ	collection	1937-07-24	NA	yes	1937	Kinabalu	NA	2133	3_Upper_montane	male	NA	adult	yes	no	NA	166	289	123	47	15	NA	NA	NA	NA	NA	NA	0	0	0	0	0	1	1	0
MCZ36144	MCZ36144	MCZ	collection	1937-07-08	NA	yes	1937	Kinabalu	NA	1676	2_Lower_montane	male	NA	adult	yes	no	NA	158	292	134	36	15	NA	NA	NA	NA	NA	NA	0	0	0	0	0	1	1	0
MCZ36404	MCZ36404	MCZ	collection	1937-08-09	NA	yes	1937	Kinabalu	NA	1676	2_Lower_montane	female	NA	NOadult	yes	no	NA	NA	271	NA	NA	14	NA	NA	NA	NA	NA	NA	0	0	0	0	0	0	0	0
MCZ36405	MCZ36405	MCZ	collection	1937-06-17	NA	yes	1937	Kinabalu	NA	1676	2_Lower_montane	female	NA	NOadult	yes	no	NA	NA	281	NA	36	14	NA	NA	NA	NA	NA	NA	0	0	0	0	0	0	0	0
MCZ36406	MCZ36406	MCZ	collection	1937-06-21	NA	yes	1937	Kinabalu	NA	1676	2_Lower_montane	male	NA	adult	yes	no	NA	NA	302	NA	NA	17	NA	NA	NA	NA	NA	NA	0	0	0	0	0	1	0	0
MCZ36407	MCZ36407	MCZ	collection	1937-06-21	NA	yes	1937	Kinabalu	NA	1676	2_Lower_montane	female	NA	NA	no	no	NA	NA	300	NA	NA	18	NA	NA	NA	NA	NA	NA	0	0	0	0	0	0	0	0
MCZ36408	MCZ36408	MCZ	collection	1937-06-20	NA	yes	1937	Kinabalu	NA	1676	2_Lower_montane	male	NA	adult	yes	no	NA	NA	314	NA	NA	19	NA	NA	NA	NA	NA	NA	0	0	0	0	0	1	0	0
MCZ36409	MCZ36409	MCZ	collection	1937-06-21	NA	yes	1937	Kinabalu	NA	1676	2_Lower_montane	male	NA	NOadult	yes	no	NA	NA	292	NA	NA	16	NA	NA	NA	NA	NA	NA	0	0	0	0	0	0	0	0
MCZ36410	MCZ36410	MCZ	collection	1937-06-21	NA	yes	1937	Kinabalu	NA	1676	2_Lower_montane	female	NA	NOadult	yes	no	NA	NA	321	NA	NA	20	NA	NA	NA	NA	NA	NA	0	0	0	0	0	0	0	0
MCZ36411	MCZ36411	MCZ	collection	1937-07-27	NA	yes	1937	Kinabalu	NA	2133	3_Upper_montane	female	NA	NOadult	yes	no	NA	145	266	121	38	12	NA	NA	NA	NA	NA	NA	0	0	0	0	0	0	0	0
MCZ36412	MCZ36412	MCZ	collection	1937-07-28	NA	yes	1937	Kinabalu	NA	1676	2_Lower_montane	male	NA	NA	no	no	NA	148	299	151	45	17	NA	NA	NA	NA	NA	NA	0	0	0	0	0	0	0	0
MCZ36413	MCZ36413	MCZ	collection	1937-07-29	NA	yes	1937	Kinabalu	NA	2133	3_Upper_montane	male	NA	NOadult	yes	no	NA	145	272	127	39	14	NA	NA	NA	NA	NA	NA	0	0	0	0	0	0	0	0
MCZ36415	MCZ36415	MCZ	collection	1937-07-27	NA	yes	1937	Kinabalu	NA	2133	3_Upper_montane	male	NA	NA	no	no	NA	161	311	150	40	15	NA	NA	NA	NA	NA	NA	0	0	0	0	0	0	0	0
MCZ36418	MCZ36418	MCZ	collection	1937-07-14	NA	yes	1937	Kinabalu	NA	2133	3_Upper_montane	male	NA	adult	yes	no	NA	165	318	153	42	16	NA	NA	NA	NA	NA	NA	0	0	0	0	0	1	1	0
MCZ36419	MCZ36419	MCZ	collection	1937-07-17	NA	yes	1937	Kinabalu	NA	2133	3_Upper_montane	male	NA	NOadult	yes	no	NA	94	229	135	39	16	NA	NA	NA	NA	NA	NA	0	0	0	0	0	0	0	0
MCZ36420	MCZ36420	MCZ	collection	1937-07-14	NA	yes	1937	Kinabalu	NA	1524	2_Lower_montane	female	NA	NOadult	yes	no	NA	164	305	141	36	15	NA	NA	NA	NA	NA	NA	0	0	0	0	0	0	0	0
MCZ36422	MCZ36422	MCZ	collection	1937-07-18	NA	yes	1937	Kinabalu	NA	1676	2_Lower_montane	male	NA	NOadult	yes	no	NA	165	299	134	34	18	NA	NA	NA	NA	NA	NA	0	0	0	0	0	0	0	0
MCZ36423	MCZ36423	MCZ	collection	1937-07-09	NA	yes	1937	Kinabalu	NA	2133	3_Upper_montane	male	NA	adult	yes	no	NA	162	315	153	40	13	NA	NA	NA	NA	NA	NA	0	0	0	0	0	1	1	0
MCZ36424	MCZ36424	MCZ	collection	1937-07-06	NA	yes	1937	Kinabalu	NA	2133	3_Upper_montane	female	NA	adult	yes	no	NA	168	300	132	46	14	NA	NA	NA	NA	NA	NA	0	0	0	0	0	1	1	0
MCZ36425	MCZ36425	MCZ	collection	1937-07-07	NA	yes	1937	Kinabalu	NA	1676	2_Lower_montane	male	NA	adult	yes	no	NA	176	320	144	46	15	NA	NA	NA	NA	NA	NA	0	0	0	0	0	1	1	0
MCZ36426	MCZ36426	MCZ	collection	1937-07-06	NA	yes	1937	Kinabalu	NA	1280	2_Lower_montane	female	NA	NOadult	yes	no	NA	172	317	145	36	15	NA	NA	NA	NA	NA	NA	0	0	0	0	0	0	0	0
MCZ36427	MCZ36427	MCZ	collection	1937-07-09	NA	yes	1937	Kinabalu	NA	2133	3_Upper_montane	male	NA	NOadult	yes	no	NA	159	296	137	38	16	NA	NA	NA	NA	NA	NA	0	0	0	0	0	0	0	0
MCZ36429	MCZ36429	MCZ	collection	1937-06-13	NA	yes	1937	Kinabalu	NA	1676	2_Lower_montane	male	NA	NOadult	yes	no	NA	NA	285	NA	NA	16	NA	NA	NA	NA	NA	NA	0	0	0	0	0	0	0	0
MCZ36430	MCZ36430	MCZ	collection	1937-06-21	NA	yes	1937	Kinabalu	NA	1676	2_Lower_montane	female	NA	adult	yes	no	NA	NA	312	NA	NA	18	NA	NA	NA	NA	NA	NA	0	0	0	0	0	1	0	0
MCZ36431	MCZ36431	MCZ	collection	1937-07-02	NA	yes	1937	Kinabalu	NA	1676	2_Lower_montane	female	NA	adult	yes	no	NA	167	299	132	38	17	NA	NA	NA	NA	NA	NA	0	0	0	0	0	1	1	0
MCZ36432	MCZ36432	MCZ	collection	1937-06-18	NA	yes	1937	Kinabalu	NA	1676	2_Lower_montane	female	NA	adult	yes	no	NA	NA	329	NA	NA	17	NA	NA	NA	NA	NA	NA	0	0	0	0	0	1	0	0
MCZ36433	MCZ36433	MCZ	collection	1937-07-05	NA	yes	1937	Kinabalu	NA	2133	3_Upper_montane	male	NA	adult	yes	no	NA	163	307	144	38	16	NA	NA	NA	NA	NA	NA	0	0	0	0	0	1	1	0
MCZ36434	MCZ36434	MCZ	collection	1937-06-13	NA	yes	1937	Kinabalu	NA	1676	2_Lower_montane	male	NA	NOadult	yes	no	NA	NA	306	NA	NA	16	NA	NA	NA	NA	NA	NA	0	0	0	0	0	0	0	0
MCZ36435	MCZ36435	MCZ	collection	1937-06-12	NA	yes	1937	Kinabalu	NA	1676	2_Lower_montane	female	NA	NA	no	no	NA	NA	305	NA	NA	18	NA	NA	NA	NA	NA	NA	0	0	0	0	0	0	0	0
MCZ36436	MCZ36436	MCZ	collection	1937-06-13	NA	yes	1937	Kinabalu	NA	1676	2_Lower_montane	male	NA	adult	yes	no	NA	NA	301	NA	NA	18	NA	NA	NA	NA	NA	NA	0	0	0	0	0	1	0	0
MCZ36437	MCZ36437	MCZ	collection	1937-07-05	NA	yes	1937	Kinabalu	NA	1676	2_Lower_montane	female	NA	NOadult	yes	no	NA	159	300	141	37	16	NA	NA	NA	NA	NA	NA	0	0	0	0	0	0	0	0
MCZ36438	MCZ36438	MCZ	collection	1937-06-18	NA	yes	1937	Kinabalu	NA	1676	2_Lower_montane	male	NA	adult	yes	no	NA	NA	325	NA	NA	16	NA	NA	NA	NA	NA	NA	0	0	0	0	0	1	0	0
MCZ36439	MCZ36439	MCZ	collection	1937-06-27	NA	yes	1937	Kinabalu	NA	1676	2_Lower_montane	female	NA	NOadult	yes	no	NA	NA	274	NA	38	14	NA	NA	NA	NA	NA	NA	0	0	0	0	0	0	0	0
MCZ36440	MCZ36440	MCZ	collection	1937-07-16	NA	yes	1937	Kinabalu	NA	1676	2_Lower_montane	male	NA	NOadult	yes	no	NA	159	300	141	40	13	NA	NA	NA	NA	NA	NA	0	0	0	0	0	0	0	0
MCZ36441	MCZ36441	MCZ	collection	1937-07-16	NA	yes	1937	Kinabalu	NA	1676	2_Lower_montane	male	NA	NOadult	yes	no	NA	174	305	131	37	13	NA	NA	NA	NA	NA	NA	0	0	0	0	0	0	0	0
MCZ36442	MCZ36442	MCZ	collection	1937-07-06	NA	yes	1937	Kinabalu	NA	1676	2_Lower_montane	male	NA	adult	yes	no	NA	NA	321	NA	NA	20	NA	NA	NA	NA	NA	NA	0	0	0	0	0	1	0	0
MCZ36443	MCZ36443	MCZ	collection	1937-06-21	NA	yes	1937	Kinabalu	NA	1676	2_Lower_montane	female	NA	adult	yes	no	NA	NA	318	NA	NA	17	NA	NA	NA	NA	NA	NA	0	0	0	0	0	1	0	0
MCZ36444	MCZ36444	MCZ	collection	1937-06-11	NA	yes	1937	Kinabalu	NA	1676	2_Lower_montane	male	NA	NOadult	yes	no	NA	NA	308	NA	NA	17	NA	NA	NA	NA	NA	NA	0	0	0	0	0	0	0	0
MCZ36445	MCZ36445	MCZ	collection	1937-07-08	NA	yes	1937	Kinabalu	NA	1676	2_Lower_montane	male	NA	NOadult	yes	no	NA	178	319	141	37	15	NA	NA	NA	NA	NA	NA	0	0	0	0	0	0	0	0
MCZ36446	MCZ36446	MCZ	collection	1937-07-26	NA	yes	1937	Kinabalu	NA	2133	3_Upper_montane	female	NA	NOadult	yes	no	NA	144	283	139	34	13	NA	NA	NA	NA	NA	NA	0	0	0	0	0	0	0	0
MCZ36447	MCZ36447	MCZ	collection	1937-07-24	NA	yes	1937	Kinabalu	NA	2133	3_Upper_montane	female	NA	NOadult	yes	no	NA	150	281	131	38	15	NA	NA	NA	NA	NA	NA	0	0	0	0	0	0	0	0
MCZ36448	MCZ36448	MCZ	collection	1937-07-06	NA	yes	1937	Kinabalu	NA	2133	3_Upper_montane	female	NA	adult	yes	no	NA	166	322	156	37	15	NA	NA	NA	NA	NA	NA	0	0	0	0	0	1	1	0
MCZ36449	MCZ36449	MCZ	collection	1937-07-24	NA	yes	1937	Kinabalu	NA	2133	3_Upper_montane	female	NA	adult	yes	no	NA	145	271	126	34	13	NA	NA	NA	NA	NA	NA	0	0	0	0	0	1	1	0
MCZ41013	MCZ41013	MCZ	collection	1937-08-08	NA	yes	1937	Kinabalu	NA	3353	4_Subalpine	female	NA	adult	yes	no	NA	177	322	145	41	14	NA	NA	NA	NA	NA	NA	0	0	0	0	0	1	1	0
MCZ41014	MCZ41014	MCZ	collection	1937-08-08	NA	yes	1937	Kinabalu	NA	3353	4_Subalpine	male	NA	adult	yes	no	NA	165	301	136	39	15	NA	NA	NA	NA	NA	NA	0	0	0	0	0	1	1	0
MCZ41015	MCZ41015	MCZ	collection	1937-08-13	NA	yes	1937	Kinabalu	NA	2987	4_Subalpine	male	NA	adult	yes	no	NA	157	270	113	43	19	NA	NA	NA	NA	NA	NA	0	0	0	0	0	1	1	0
MCZ41016	MCZ41016	MCZ	collection	1937-08-13	NA	yes	1937	Kinabalu	NA	3353	4_Subalpine	female	NA	NOadult	yes	no	NA	157	308	151	39	15	NA	NA	NA	NA	NA	NA	0	0	0	0	0	0	0	0
MCZ41017	MCZ41017	MCZ	collection	1937-08-13	NA	yes	1937	Kinabalu	NA	3353	4_Subalpine	male	NA	adult	yes	no	NA	161	320	159	41	17	NA	NA	NA	NA	NA	NA	0	0	0	0	0	1	1	0
MCZ41018	MCZ41018	MCZ	collection	1937-08-13	NA	yes	1937	Kinabalu	NA	2987	4_Subalpine	female	NA	adult	yes	no	NA	162	303	141	42	15	NA	NA	NA	NA	NA	NA	0	0	0	0	0	1	1	0
MCZ41019	MCZ41019	MCZ	collection	1937-08-10	NA	yes	1937	Kinabalu	NA	3353	4_Subalpine	male	NA	adult	yes	no	NA	160	300	140	40	20	NA	NA	NA	NA	NA	NA	0	0	0	0	0	1	1	0
MCZ41022	MCZ41022	MCZ	collection	1937-08-08	NA	yes	1937	Kinabalu	NA	3353	4_Subalpine	female	NA	adult	yes	no	NA	168	310	142	40	15	NA	NA	NA	NA	NA	NA	0	0	0	0	0	1	1	0
MCZ41030	MCZ41030	MCZ	collection	1937-08-08	NA	yes	1937	Kinabalu	NA	3353	4_Subalpine	male	NA	NOadult	yes	no	NA	146	298	152	42	15	NA	NA	NA	NA	NA	NA	0	0	0	0	0	0	0	0
MCZ41031	MCZ41031	MCZ	collection	1937-07-12	NA	yes	1937	Kinabalu	NA	3353	4_Subalpine	male	NA	adult	yes	no	NA	162	295	133	37	15	NA	NA	NA	NA	NA	NA	0	0	0	0	0	1	1	0
NH1007	NH1007	NH	collection	1971-09-10	NA	yes	1971	CrockerRange	Kg_Kalanggan_Penampang	876	1_Lowland	female	NA	NA	no	no	102	155	295	140	35	16	NA	NA	NA	NA	NA	NA	0	0	0	0	0	1	0	0
NH1008	NH1008	NH	collection	1971-09-10	NA	yes	1971	CrockerRange	Kg_Kalanggan_Penampang	876	1_Lowland	female	NA	NA	no	no	124	162	307	145	39	15	NA	NA	NA	NA	NA	NA	0	0	0	0	0	1	0	0
NH1009	NH1009	NH	collection	1971-09-10	NA	yes	1971	CrockerRange	Kg_Kalanggan_Penampang	876	1_Lowland	male	NA	NA	no	no	121	166	308	142	38	14	NA	NA	NA	NA	NA	NA	0	0	0	0	0	1	0	0
NH1010	NH1010	NH	collection	1971-09-10	NA	yes	1971	CrockerRange	Kg_Kalanggan_Penampang	876	1_Lowland	male	NA	NA	no	no	132	170	305	135	37	14	NA	NA	NA	NA	NA	NA	0	0	0	0	0	1	0	0
NH1011	NH1011	NH	collection	1971-09-10	NA	yes	1971	CrockerRange	Kg_Kalanggan_Penampang	876	1_Lowland	male	NA	NA	no	no	131	165	315	150	34	16	NA	NA	NA	NA	NA	NA	0	0	0	0	0	1	0	0
NH1012	NH1012	NH	collection	1971-09-10	NA	yes	1971	CrockerRange	Kg_Kalanggan_Penampang	876	1_Lowland	female	NA	NA	no	no	134	167	322	155	38	13	NA	NA	NA	NA	NA	NA	0	0	0	0	0	1	0	0
NH1013	NH1013	NH	collection	1971-09-10	NA	yes	1971	CrockerRange	Kg_Kalanggan_Penampang	876	1_Lowland	female	NA	NA	no	no	136	160	300	140	36	16	NA	NA	NA	NA	NA	NA	0	0	0	0	0	1	0	0
NH1014	NH1014	NH	collection	1971-09-10	NA	yes	1971	CrockerRange	Kg_Kalanggan_Penampang	876	1_Lowland	female	NA	NA	no	no	157	177	322	145	40	13	NA	NA	NA	NA	NA	NA	0	0	0	0	0	1	0	0
NH1015	NH1015	NH	collection	1971-09-10	NA	yes	1971	CrockerRange	Kg_Kalanggan_Penampang	876	1_Lowland	female	NA	NA	no	no	131	160	305	145	36	16	NA	NA	NA	NA	NA	NA	0	0	0	0	0	1	0	0
NH1018	NH1018	NH	collection	1971-12-14	NA	yes	1971	CrockerRange	Kg_Togudon_Penampang	772	1_Lowland	female	NA	NA	no	no	130	160	310	150	35	16	NA	NA	NA	NA	NA	NA	0	0	0	0	0	1	0	0
NH1021	NH1021	NH	collection	1971-12-14	NA	yes	1971	CrockerRange	Kg_Togudon_Penampang	772	1_Lowland	male	NA	NA	no	no	160	170	321	151	37	16	NA	NA	NA	NA	NA	NA	0	0	0	0	0	1	0	0
NH1022	NH1022	NH	collection	1971-12-11	NA	yes	1971	CrockerRange	Kg_Kalanggan_Penampang	876	1_Lowland	male	NA	NA	no	no	136	170	330	160	37	16	NA	NA	NA	NA	NA	NA	0	0	0	0	0	1	0	0
NH1023	NH1023	NH	collection	1971-12-11	NA	yes	1971	CrockerRange	Kg_Kalanggan_Penampang	876	1_Lowland	female	NA	NA	no	no	154	165	300	135	37	17	NA	NA	NA	NA	NA	NA	0	0	0	0	0	1	0	0
NH1024	NH1024	NH	collection	1971-12-11	NA	yes	1971	CrockerRange	Kg_Kalanggan_Penampang	876	1_Lowland	female	NA	NA	no	no	133	170	300	130	37	15	NA	NA	NA	NA	NA	NA	0	0	0	0	0	1	0	0
NH1025	NH1025	NH	collection	1971-12-14	NA	yes	1971	CrockerRange	Kg_Kalanggan_Penampang	876	1_Lowland	male	NA	NA	no	no	138	175	330	155	36	14	NA	NA	NA	NA	NA	NA	0	0	0	0	0	1	0	0
NH1026	NH1026	NH	collection	1971-12-14	NA	yes	1971	CrockerRange	Kg_Togudon_Penampang	772	1_Lowland	male	NA	NA	no	no	133	170	325	155	37	15	NA	NA	NA	NA	NA	NA	0	0	0	0	0	1	0	0
NH1027	NH1027	NH	collection	1971-11-29	NA	yes	1971	CrockerRange	Kg_Togudon_Penampang	772	1_Lowland	male	NA	NA	no	no	138	175	315	140	38	13	NA	NA	NA	NA	NA	NA	0	0	0	0	0	1	0	0
NH1028	NH1028	NH	collection	1971-12-14	NA	yes	1971	CrockerRange	Kg_Togudon_Penampang	772	1_Lowland	male	NA	NA	no	no	160	160	260	100	36	16	NA	NA	NA	NA	NA	NA	0	0	0	0	0	1	0	0
NH1029	NH1029	NH	collection	1971-12-26	NA	yes	1971	CrockerRange	Kg_Togudon_Penampang	772	1_Lowland	male	NA	NA	no	no	144	185	335	150	36	15	NA	NA	NA	NA	NA	NA	0	0	0	0	0	1	0	0
NH1030	NH1030	NH	collection	1971-12-21	NA	yes	1971	CrockerRange	Kg_Togudon_Penampang	772	1_Lowland	female	NA	NA	no	no	113	160	310	150	31	16	NA	NA	NA	NA	NA	NA	0	0	0	0	0	1	0	0
NH1031	NH1031	NH	collection	1971-06-23	NA	yes	1971	CrockerRange	Kg_Togudon_Penampang	772	1_Lowland	female	NA	NA	no	no	130	170	330	160	30	15	NA	NA	NA	NA	NA	NA	0	0	0	0	0	1	0	0
NH1032	NH1032	NH	collection	1971-06-23	NA	yes	1971	CrockerRange	Kg_Togudon_Penampang	772	1_Lowland	male	NA	NA	no	no	128	185	345	160	31	14	NA	NA	NA	NA	NA	NA	0	0	0	0	0	1	0	0
NH1033	NH1033	NH	collection	1971-12-26	NA	yes	1971	CrockerRange	Kg_Togudon_Penampang	772	1_Lowland	female	NA	NA	no	no	104	175	320	145	35	11	NA	NA	NA	NA	NA	NA	0	0	0	0	0	1	0	0
NH1034	NH1034	NH	collection	1971-06-23	NA	yes	1971	CrockerRange	Kg_Togudon_Penampang	772	1_Lowland	male	NA	NA	no	no	140	185	335	150	31	14	NA	NA	NA	NA	NA	NA	0	0	0	0	0	1	0	0
NH1035	NH1035	NH	collection	1971-06-23	NA	yes	1971	CrockerRange	Kg_Togudon_Penampang	772	1_Lowland	female	NA	NA	no	no	129	175	335	160	30	13	NA	NA	NA	NA	NA	NA	0	0	0	0	0	1	0	0
NH1036	NH1036	NH	collection	1971-06-23	NA	yes	1971	CrockerRange	Kg_Togudon_Penampang	772	1_Lowland	female	NA	NA	no	no	190	175	430	255	28	13	NA	NA	NA	NA	NA	NA	0	0	0	0	0	1	0	0
NH1037	NH1037	NH	collection	1971-12-26	NA	yes	1971	CrockerRange	Kg_Togudon_Penampang	772	1_Lowland	male	NA	NA	no	no	134	200	370	170	44	15	NA	NA	NA	NA	NA	NA	0	0	0	0	0	1	0	0
NH1038	NH1038	NH	collection	1971-06-23	NA	yes	1971	CrockerRange	Kg_Togudon_Penampang	772	1_Lowland	male	NA	NA	no	no	128	182	332	150	30	13	NA	NA	NA	NA	NA	NA	0	0	0	0	0	1	0	0
NH1039	NH1039	NH	collection	1971-06-23	NA	yes	1971	CrockerRange	Kg_Togudon_Penampang	772	1_Lowland	female	NA	NA	no	no	130	190	360	170	29	13	NA	NA	NA	NA	NA	NA	0	0	0	0	0	1	0	0
NH1040	NH1040	NH	collection	1971-12-26	NA	yes	1971	CrockerRange	Kg_Togudon_Penampang	772	1_Lowland	female	NA	NA	no	no	144	185	330	145	35	13	NA	NA	NA	NA	NA	NA	0	0	0	0	0	1	0	0
NH1041	NH1041	NH	collection	1971-12-26	NA	yes	1971	CrockerRange	Kg_Togudon_Penampang	772	1_Lowland	female	NA	NA	no	no	118	170	310	140	35	13	NA	NA	NA	NA	NA	NA	0	0	0	0	0	1	0	0
NH1042	NH1042	NH	collection	1971-12-14	NA	yes	1971	CrockerRange	Kg_Togudon_Penampang	772	1_Lowland	male	NA	NA	no	no	158	173	293	120	40	16	NA	NA	NA	NA	NA	NA	0	0	0	0	0	1	0	0
NH1043	NH1043	NH	collection	1971-06-23	NA	yes	1971	CrockerRange	Kg_Togudon_Penampang	772	1_Lowland	female	NA	NA	no	no	131	180	345	165	32	16	NA	NA	NA	NA	NA	NA	0	0	0	0	0	1	0	0
NH1044	NH1044	NH	collection	1971-11-23	NA	yes	1971	CrockerRange	Kg_Togudon_Penampang	772	1_Lowland	female	NA	NA	no	no	130	180	NA	NA	29	15	NA	NA	NA	NA	NA	NA	0	0	0	0	0	1	0	0
NH1045	NH1045	NH	collection	1971-11-13	NA	yes	1971	CrockerRange	Kg_Togudon_Penampang	772	1_Lowland	female	NA	NA	no	no	138	165	310	145	35	15	NA	NA	NA	NA	NA	NA	0	0	0	0	0	1	0	0
NH1054	NH1054	NH	collection	1971-09-10	NA	yes	1971	CrockerRange	Kg_Kalanggan_Tuaran	876	1_Lowland	female	NA	NA	no	no	145	170	310	140	34	15	NA	NA	NA	NA	NA	NA	0	0	0	0	0	1	0	0
NH1055	NH1055	NH	collection	1971-09-10	NA	yes	1971	CrockerRange	Kg_Kalanggan_Tuaran	876	1_Lowland	male	NA	NA	no	no	136	170	310	140	36	16	NA	NA	NA	NA	NA	NA	0	0	0	0	0	1	0	0
NH1056	NH1056	NH	collection	1971-09-10	NA	yes	1971	CrockerRange	Kg_Kalanggan_Tuaran	876	1_Lowland	male	NA	NA	no	no	139	170	320	150	34	16	NA	NA	NA	NA	NA	NA	0	0	0	0	0	1	0	0
NH1077	NH1077	NH	collection	1971-11-13	NA	yes	1971	CrockerRange	Kg_Togudon_Penampang	772	1_Lowland	female	NA	NA	no	no	140	160	300	140	34	16	NA	NA	NA	NA	NA	NA	0	0	0	0	0	1	0	0
NH1083	NH1083	NH	collection	1971-09-10	NA	yes	1971	CrockerRange	Kg_Kalanggan_Penampang	876	1_Lowland	male	NA	NA	no	no	120	165	305	140	35	17	NA	NA	NA	NA	NA	NA	0	0	0	0	0	1	0	0
NH1084	NH1084	NH	collection	1971-09-10	NA	yes	1971	CrockerRange	Kg_Kalanggan_Penampang	876	1_Lowland	male	NA	NA	no	no	124	165	315	150	35	16	NA	NA	NA	NA	NA	NA	0	0	0	0	0	1	0	0
NH1085	NH1085	NH	collection	1971-09-10	NA	yes	1971	CrockerRange	Kg_Kalanggan_Penampang	876	1_Lowland	male	NA	NA	no	no	138	174	339	165	40	14	NA	NA	NA	NA	NA	NA	0	0	0	0	0	1	0	0
NH1086	NH1086	NH	collection	1971-09-10	NA	yes	1971	CrockerRange	Kg_Kalanggan_Penampang	876	1_Lowland	female	NA	NA	no	no	137	166	318	152	39	15	NA	NA	NA	NA	NA	NA	0	0	0	0	0	1	0	0
NH1087	NH1087	NH	collection	1971-11-13	NA	yes	1971	CrockerRange	Kg_Togudon_Penampang	772	1_Lowland	female	NA	NA	no	no	125	160	300	140	36	15	NA	NA	NA	NA	NA	NA	0	0	0	0	0	1	0	0
NH1088	NH1088	NH	collection	1971-11-13	NA	yes	1971	CrockerRange	Kg_Togudon_Penampang	772	1_Lowland	female	NA	NA	no	no	140	160	300	140	36	17	NA	NA	NA	NA	NA	NA	0	0	0	0	0	1	0	0
NH1089	NH1089	NH	collection	1971-06-21	NA	yes	1971	CrockerRange	Kg_Togudon_Penampang	772	1_Lowland	male	NA	NA	no	no	NA	180	325	145	34	15	NA	NA	NA	NA	NA	NA	0	0	0	0	0	1	0	0
NH1090	NH1090	NH	collection	1971-06-21	NA	yes	1971	CrockerRange	Kg_Togudon_Penampang	772	1_Lowland	female	NA	NA	no	no	151	175	310	135	39	18	NA	NA	NA	NA	NA	NA	0	0	0	0	0	1	0	0
NH1091	NH1091	NH	collection	1971-06-21	NA	yes	1971	CrockerRange	Kg_Togudon_Penampang	772	1_Lowland	male	NA	NA	no	no	144	167	314	147	40	15	NA	NA	NA	NA	NA	NA	0	0	0	0	0	1	0	0
NH1093	NH1093	NH	collection	1971-11-13	NA	yes	1971	CrockerRange	Kg_Togudon_Penampang	772	1_Lowland	female	NA	NA	no	no	138	170	310	140	34	15	NA	NA	NA	NA	NA	NA	0	0	0	0	0	1	0	0
NH1094	NH1094	NH	collection	1971-06-21	NA	yes	1971	CrockerRange	Kg_Togudon_Penampang	772	1_Lowland	male	NA	NA	no	no	119	175	338	163	37	15	NA	NA	NA	NA	NA	NA	0	0	0	0	0	1	0	0
NH1095	NH1095	NH	collection	1971-11-13	NA	yes	1971	CrockerRange	Kg_Togudon_Penampang	772	1_Lowland	female	NA	NA	no	no	120	160	310	150	36	16	NA	NA	NA	NA	NA	NA	0	0	0	0	0	1	0	0
NH1096	NH1096	NH	collection	1971-06-21	NA	yes	1971	CrockerRange	Kg_Togudon_Penampang	772	1_Lowland	male	NA	NA	no	no	NA	155	295	140	31	14	NA	NA	NA	NA	NA	NA	0	0	0	0	0	1	0	0
NH1097	NH1097	NH	collection	1971-06-21	NA	yes	1971	CrockerRange	Kg_Togudon_Penampang	772	1_Lowland	male	NA	NA	no	no	NA	168	308	140	36	17	NA	NA	NA	NA	NA	NA	0	0	0	0	0	1	0	0
NH1098	NH1098	NH	collection	1971-06-21	NA	yes	1971	CrockerRange	Kg_Togudon_Penampang	772	1_Lowland	male	NA	NA	no	no	146	175	335	160	37	18	NA	NA	NA	NA	NA	NA	0	0	0	0	0	1	0	0
NH1839	NH1839	NH	collection	1971-06-21	NA	yes	1971	CrockerRange	Kg_Togudon_Penampang	772	1_Lowland	NA	NA	NA	no	no	103	145	245	100	33	35	NA	NA	NA	NA	NA	NA	0	0	0	0	0	1	0	0
NH1840	NH1840	NH	collection	1971-03-23	NA	yes	1971	CrockerRange	Kg_Togudon_Penampang	772	1_Lowland	female	NA	NA	no	no	124	175	335	160	30	14	NA	NA	NA	NA	NA	NA	0	0	0	0	0	1	0	0
NH2721	NH2721	NH	collection	1988-05-16	NA	yes	1988	CrockerRange	Ml_16_Kimanis_Keningau_Road	NA	NA	male	NA	NA	no	no	140	177	320	143	39	NA	NA	NA	NA	NA	NA	NA	0	0	0	0	0	1	0	0
NH2722	NH2722	NH	collection	1988-05-17	NA	yes	1988	CrockerRange	Ml_16_Kimanis_Keningau_Road	NA	NA	male	NA	NA	no	no	158	170	320	150	38	9	NA	NA	NA	NA	NA	NA	0	0	0	0	0	1	0	0
NH2723	NH2723	NH	collection	1988-05-17	NA	yes	1988	CrockerRange	Ml_16_Kimanis_Keningau_Road	NA	NA	female	NA	NA	no	no	142	167	310	143	37	9	NA	NA	NA	NA	NA	NA	0	0	0	0	0	1	0	0
NH3267	NH3267	NH	collection	1987-05-23	NA	yes	1987	CrockerRange	Ml_16_Kimanis_Keningau_Road	NA	NA	male	NA	NA	no	no	NA	192	365	173	48	18	NA	NA	NA	NA	NA	NA	0	0	0	0	0	1	0	0
NH3501	NH3501	NH	collection	1993-02-02	NA	yes	1993	CrockerRange	Ml_28_Kg_Togudon_Tambunan_Rd	772	1_Lowland	male	NA	NA	no	no	118	177	328	151	41	16	NA	NA	NA	NA	NA	NA	0	0	0	0	0	1	0	0
NH3502	NH3502	NH	collection	1993-02-02	NA	yes	1993	CrockerRange	Ml_28_Kg_Togudon_Tambunan_Rd	772	1_Lowland	female	NA	NA	no	no	106	165	NA	NA	40	16	NA	NA	NA	NA	NA	NA	0	0	0	0	0	1	0	0
NH3503	NH3503	NH	collection	1993-02-02	NA	yes	1993	CrockerRange	Ml_28_Kg_Togudon_Tambunan_Rd	772	1_Lowland	male	NA	NA	no	no	130	169	NA	NA	41	16	NA	NA	NA	NA	NA	NA	0	0	0	0	0	1	0	0
NH3886	NH3886	NH	collection	1994-02-25	NA	yes	1994	Kinabalu	Mesilau_River_Pinsulok_Kundasang_Ranau	1810	2_Lower_montane	NA	NA	NA	no	no	110	170	310	140	39	14	NA	NA	NA	NA	NA	NA	0	0	0	0	0	1	0	0
NH3967	NH3967	NH	collection	1995-06-28	NA	yes	1995	MaliganRange	G_Lumaku_Sipitang	1365	2_Lower_montane	female	NA	NA	no	no	120	168	317	149	40	15	NA	NA	NA	NA	NA	NA	0	0	0	0	0	1	0	0
NH3968	NH3968	NH	collection	1995-06-28	NA	yes	1995	MaliganRange	G_Lumaku_Sipitang	1365	2_Lower_montane	male	NA	NA	no	no	150	174	344	170	40	14	NA	NA	NA	NA	NA	NA	0	0	0	0	0	1	0	0
NH3972	NH3972	NH	collection	1995-06-29	NA	yes	1995	MaliganRange	G_Lumaku_Sipitang	1365	2_Lower_montane	female	NA	NA	no	no	100	156	301	145	36	15	NA	NA	NA	NA	NA	NA	0	0	0	0	0	1	0	0
NH3973	NH3973	NH	collection	1995-06-29	NA	yes	1995	MaliganRange	G_Lumaku_Sipitang	1365	2_Lower_montane	female	NA	NA	no	no	100	165	315	150	35	13	NA	NA	NA	NA	NA	NA	0	0	0	0	0	1	0	0
NH3975	NH3975	NH	collection	1995-06-29	NA	yes	1995	MaliganRange	G_Lumaku_Sipitang	1365	2_Lower_montane	male	NA	NA	no	no	100	158	318	160	38	14	NA	NA	NA	NA	NA	NA	0	0	0	0	0	1	0	0
NH3979	NH3979	NH	collection	1995-07-01	NA	yes	1995	MaliganRange	G_Lumaku_Sipitang	1365	2_Lower_montane	male	NA	NA	no	no	110	165	334	169	37	15	NA	NA	NA	NA	NA	NA	0	0	0	0	0	1	0	0
NH3980	NH3980	NH	collection	1995-07-01	NA	yes	1995	MaliganRange	G_Lumaku_Sipitang	1365	2_Lower_montane	male	NA	NA	no	no	110	165	330	165	41	15	NA	NA	NA	NA	NA	NA	0	0	0	0	0	1	0	0
NH3981	NH3981	NH	collection	1995-07-01	NA	yes	1995	MaliganRange	G_Lumaku_Sipitang	1365	2_Lower_montane	male	NA	NA	no	no	160	175	323	148	37	15	NA	NA	NA	NA	NA	NA	0	0	0	0	0	1	0	0
NH4222	NH4222	NH	collection	1996-07-16	NA	yes	1996	MaliganRange	Hutan_Simpan_Gunung_Lumaku_Sipitang	1500	2_Lower_montane	male	NA	NA	no	no	80	150	290	140	37	15	NA	NA	NA	NA	NA	NA	0	0	0	0	0	1	0	0
NH4223	NH4223	NH	collection	1996-07-16	NA	yes	1996	MaliganRange	Hutan_Simpan_Gunung_Lumaku_Sipitang	1500	2_Lower_montane	male	NA	NA	no	no	110	170	330	160	37	16	NA	NA	NA	NA	NA	NA	0	0	0	0	0	1	0	0
NH4226	NH4226	NH	collection	1996-07-17	NA	yes	1996	MaliganRange	Hutan_Simpan_Gunung_Lumaku_Sipitang	1500	2_Lower_montane	male	NA	NA	no	no	110	165	315	150	36	12	NA	NA	NA	NA	NA	NA	0	0	0	0	0	1	0	0
NH4228	NH4228	NH	collection	1996-07-18	NA	yes	1996	MaliganRange	Hutan_Simpan_Gunung_Lumaku_Sipitang	1500	2_Lower_montane	male	NA	NA	no	no	130	170	320	150	38	15	NA	NA	NA	NA	NA	NA	0	0	0	0	0	1	0	0
NH4229	NH4229	NH	collection	1996-07-18	NA	yes	1996	MaliganRange	Hutan_Simpan_Gunung_Lumaku_Sipitang	1500	2_Lower_montane	male	NA	NA	no	no	110	175	330	155	35	14	NA	NA	NA	NA	NA	NA	0	0	0	0	0	1	0	0
NH4230	NH4230	NH	collection	1996-07-18	NA	yes	1996	MaliganRange	Hutan_Simpan_Gunung_Lumaku_Sipitang	1500	2_Lower_montane	female	NA	NA	no	no	110	165	315	150	36	15	NA	NA	NA	NA	NA	NA	0	0	0	0	0	1	0	0
NH4236	NH4236	NH	collection	1996-07-21	NA	yes	1996	MaliganRange	Hutan_Simpan_Gunung_Lumaku_Sipitang	1500	2_Lower_montane	male	NA	NA	no	no	110	170	330	160	37	15	NA	NA	NA	NA	NA	NA	0	0	0	0	0	1	0	0
NH4237	NH4237	NH	collection	1996-07-22	NA	yes	1996	MaliganRange	Hutan_Simpan_Gunung_Lumaku_Sipitang	1500	2_Lower_montane	male	NA	NA	no	no	130	170	335	165	38	15	NA	NA	NA	NA	NA	NA	0	0	0	0	0	1	0	0
NH4537	NH4537	NH	collection	1997-10-23	NA	yes	1997	MaliganRange	Ulu_Sg_Basio_Meligan_Sipitang	880	1_Lowland	male	NA	NA	no	no	120	180	340	160	38	14	NA	NA	NA	NA	NA	NA	0	0	0	0	0	1	0	0
NH4538	NH4538	NH	collection	1997-10-23	NA	yes	1997	MaliganRange	Ulu_Sg_Basio_Meligan_Sipitang	880	1_Lowland	male	NA	NA	no	no	130	175	345	170	37	15	NA	NA	NA	NA	NA	NA	0	0	0	0	0	1	0	0
NH4539	NH4539	NH	collection	1997-10-23	NA	yes	1997	MaliganRange	Ulu_Sg_Basio_Meligan_Sipitang	880	1_Lowland	male	NA	NA	no	no	130	175	335	160	35	17	NA	NA	NA	NA	NA	NA	0	0	0	0	0	1	0	0
NH4540	NH4540	NH	collection	1997-10-23	NA	yes	1997	MaliganRange	Ulu_Sg_Basio_Meligan_Sipitang	880	1_Lowland	male	NA	NA	no	no	110	165	310	145	39	16	NA	NA	NA	NA	NA	NA	0	0	0	0	0	1	0	0
NH4541	NH4541	NH	collection	1997-10-23	NA	yes	1997	MaliganRange	Ulu_Sg_Basio_Meligan_Sipitang	880	1_Lowland	NA	NA	NA	no	no	120	175	335	160	37	16	NA	NA	NA	NA	NA	NA	0	0	0	0	0	1	0	0
NH4543	NH4543	NH	collection	1997-10-24	NA	yes	1997	MaliganRange	Ulu_Sg_Basio_Meligan_Sipitang	880	1_Lowland	male	NA	NA	no	no	120	170	335	165	39	15	NA	NA	NA	NA	NA	NA	0	0	0	0	0	1	0	0
NH5248	NH5248	NH	collection	2007-11-30	NA	yes	2007	MaliganRange	Hutan_Simpan_Meligan_Sipitang	1220	2_Lower_montane	male	NA	NA	no	no	130	NA	NA	160	40	12	NA	NA	NA	NA	NA	NA	0	0	0	0	0	1	0	0
NH5251	NH5251	NH	collection	2007-12-01	NA	yes	2007	MaliganRange	Hutan_Simpan_Meligan_Sipitang	1220	2_Lower_montane	male	NA	NA	no	no	120	NA	NA	160	38	15	NA	NA	NA	NA	NA	NA	0	0	0	0	0	1	0	0
NHM71.2558	NHMUK_ZD_1971.2558	NHM	collection	1961-06-24	Harrison_JL	yes	1961	Kinabalu	N_of_Singhs_Plateau	1036	1_Lowland	male	NA	adult	yes	no	NA	NA	NA	NA	NA	NA	45.36	25.53	25.02	21.20	NA	NA	0	0	0	0	0	1	0	1
NHM71.2559	NHMUK_ZD_1971.2559	NHM	collection	1961-06-25	Harrison_JL	yes	1961	Kinabalu	N_of_Singhs_Plateau	1036	1_Lowland	female	NA	adult	yes	no	NA	NA	NA	NA	NA	NA	44.53	24.20	25.00	21.12	NA	NA	0	0	0	0	0	1	0	1
NHM71.2560	NHMUK_ZD_1971.2560	NHM	collection	1961-06-28	Harrison_JL	yes	1961	Kinabalu	Mt_Kinabalu_camp_3	2499	3_Upper_montane	NA	NA	adult	yes	no	NA	170	300	130	39	18	43.83	26.32	23.75	19.20	NA	NA	0	0	0	0	0	1	0	1
NHM71.2561	NHMUK_ZD_1971.2561	NHM	collection	1961-07-01	Harrison_JL	yes	1961	Kinabalu	Mt_Kinabalu_camp_3	2499	3_Upper_montane	female	NA	adult	yes	no	NA	160	305	145	39	18	43.68	25.35	24.60	19.86	NA	NA	0	0	0	0	0	1	0	1
NHM71.2562	NHMUK_ZD_1971.2562	NHM	collection	1961-07-01	Harrison_JL	yes	1961	Kinabalu	Mt_Kinabalu_camp_3	2499	3_Upper_montane	male	NA	adult	yes	no	NA	165	320	155	39	16	43.50	25.66	24.15	19.77	NA	NA	0	0	0	0	0	1	0	1
NHM71.2563	NHMUK_ZD_1971.2563	NHM	collection	1961-07-01	Harrison_JL	yes	1961	Kinabalu	Mt_Kinabalu_camp_3	2499	3_Upper_montane	female	NA	adult	yes	no	NA	170	320	150	39	16	44.70	27.03	24.13	20.34	NA	NA	0	0	0	0	0	1	0	1
NHM71.2564	NHMUK_ZD_1971.2564	NHM	collection	1961-07-02	Harrison_JL	yes	1961	Kinabalu	Mt_Kinabalu_camp_3	2499	3_Upper_montane	female	NA	adult	yes	no	NA	175	335	160	39	16	44.40	26.65	23.91	20.29	NA	NA	0	0	0	0	0	1	0	1
NHM71.2565	NHMUK_ZD_1971.2565	NHM	collection	1961-07-02	Harrison_JL	yes	1961	Kinabalu	Mt_Kinabalu_camp_4	2499	3_Upper_montane	female	NA	adult	yes	no	NA	160	300	140	37	17	43.54	25.64	24.10	19.53	NA	NA	0	0	0	0	0	1	0	1
NHM71.2566	NHMUK_ZD_1971.2566	NHM	collection	1961-07-09	Harrison_JL	yes	1961	Kinabalu	Mount_Kinabalu	2865	4_Subalpine	NA	NA	adult	yes	no	NA	165	310	145	37	16	43.04	24.80	24.26	19.83	NA	NA	0	0	0	0	0	1	0	1
NHM71.2567	NHMUK_ZD_1971.2567	NHM	collection	1961-07-12	Harrison_JL	yes	1961	Kinabalu	Mount_Kinabalu	3170	4_Subalpine	female	NA	adult	yes	no	NA	165	290	125	42	12	44.88	26.25	25.09	21.02	NA	NA	0	0	0	0	0	1	0	1
NHM71.2568	NHMUK_ZD_1971.2568	NHM	collection	1961-08-07	Harrison_JL	yes	1961	Kinabalu	Mount_Kinabalu	1158	1_Lowland	male	NA	NA	no	no	NA	154	316	162	44	15	44.99	25.07	25.10	20.45	NA	NA	0	0	0	0	0	0	0	1
NHM71.2569	NHMUK_ZD_1971.2569	NHM	collection	1952-06-06	Harrison_JL	yes	1952	Kinabalu	Kamarangah_camp	2438	3_Upper_montane	female	NA	adult	yes	no	105	162	305	143	40	17	44.10	25.43	24.69	20.45	NA	NA	1	0	0	0	0	1	0	1
NHM71.2570	NHMUK_ZD_1971.2570	NHM	collection	1952-06-06	Harrison_JL	yes	1952	Kinabalu	Kamarangah_camp	2438	3_Upper_montane	male	NA	adult	yes	no	100	155	290	135	38	NA	42.38	24.44	23.61	18.82	NA	NA	1	0	0	0	0	1	0	1
NHM71.2571	NHMUK_ZD_1971.2571	NHM	collection	1952-06-05	Harrison_JL	yes	1952	Kinabalu	Kamarangah_camp	2438	3_Upper_montane	male	NA	adult	yes	no	92	150	150	NA	38	16	42.12	25.71	23.64	18.65	NA	NA	1	0	0	0	0	1	0	1
NHM71.2572	NHMUK_ZD_1971.2572	NHM	collection	1952-06-06	Harrison_JL	yes	1952	Kinabalu	Kamarangah_camp	2438	3_Upper_montane	male	NA	adult	yes	no	110	160	305	145	58	16	44.73	26.85	23.80	20.52	NA	NA	1	0	0	0	0	1	0	1
NHM71.2573	NHMUK_ZD_1971.2573	NHM	collection	1952-06-08	Harrison_JL	yes	1952	Kinabalu	Kamarangah_camp	2438	3_Upper_montane	female	NA	adult	yes	no	NA	162	297	135	39	15	42.92	25.00	24.16	19.46	NA	NA	0	0	0	0	0	1	0	1
NHM71.2574	NHMUK_ZD_1971.2574	NHM	collection	1952-05-27	Harrison_JL	yes	1952	Kinabalu	Tinampoh_Bundu_Tuhan_forest	1100	1_Lowland	female	NA	adult	yes	no	NA	NA	NA	NA	NA	NA	45.85	25.56	25.38	21.10	NA	NA	0	0	0	0	0	1	0	1
NHM71.2575	NHMUK_ZD_1971.2575	NHM	collection	1952-05-31	Harrison_JL	yes	1952	Kinabalu	Tinampoh_Bundu_Tuhan_forest	1100	1_Lowland	female	NA	NOadult	yes	no	NA	NA	NA	NA	NA	NA	43.76	NA	NA	NA	NA	NA	0	0	0	0	0	0	0	1
NHM71.2576	NHMUK_ZD_1971.2576	NHM	collection	1952-05-25	Harrison_JL	yes	1952	Kinabalu	Tinampoh_Bundu_Tuhan_forest	1100	1_Lowland	male	NA	adult	yes	no	NA	NA	NA	NA	NA	NA	46.68	25.38	26.42	22.86	NA	NA	0	0	0	0	0	1	0	1
NHM71.2577	NHMUK_ZD_1971.2577	NHM	collection	1952-05-30	Harrison_JL	yes	1952	Kinabalu	Tinampoh_Bundu_Tuhan_forest	1100	1_Lowland	male	NA	adult	yes	no	NA	NA	NA	NA	NA	NA	44.40	25.45	24.89	21.26	NA	NA	0	0	0	0	0	1	0	1
NHM71.2579	NHMUK_ZD_1971.2579	NHM	collection	1952-05-27	Harrison_JL	yes	1952	Kinabalu	Tinampoh_Bundu_Tuhan_forest	1100	1_Lowland	female	NA	NOadult	yes	no	NA	NA	NA	NA	NA	NA	42.52	NA	NA	NA	NA	NA	0	0	0	0	0	0	0	1
NHM71.2580	NHMUK_ZD_1971.2580	NHM	collection	1952-05-31	Harrison_JL	yes	1952	Kinabalu	Tinampoh_Bundu_Tuhan_forest	1100	1_Lowland	male	NA	adult	yes	no	NA	NA	NA	NA	NA	NA	46.67	26.22	25.88	21.92	NA	NA	0	0	0	0	0	1	0	1
NHM71.2581	NHMUK_ZD_1971.2581	NHM	collection	1952-05-28	Harrison_JL	yes	1952	Kinabalu	Tinampoh_Bundu_Tuhan_forest	1100	1_Lowland	male	NA	NOadult	yes	no	NA	NA	NA	NA	NA	NA	44.09	NA	NA	NA	NA	NA	0	0	0	0	0	0	0	1
NHM71.2582	NHMUK_ZD_1971.2582	NHM	collection	1952-05-03	Harrison_JL	yes	1952	Kinabalu	Tinampoh_Bundu_Tuhan_forest	1100	1_Lowland	male	NA	NA	no	no	NA	NA	NA	NA	NA	NA	44.85	26.07	25.30	20.92	NA	NA	0	0	0	0	0	0	0	1
NHM71.2583	NHMUK_ZD_1971.2583	NHM	collection	1952-05-27	Harrison_JL	yes	1952	Kinabalu	Tinampoh_Bundu_Tuhan_forest	1100	1_Lowland	female	NA	NOadult	yes	no	NA	NA	NA	NA	NA	NA	NA	NA	NA	NA	NA	NA	0	0	0	0	0	0	0	0
NHM71.2585	NHMUK_ZD_1971.2585	NHM	collection	1953-07-19	Harrison_JL	yes	1953	TrusMadi	Trus_Madi_Mountain_Pampang_Camp	2300	3_Upper_montane	NA	NA	adult	yes	no	125	170	NA	160	38	15	NA	NA	NA	NA	NA	NA	0	0	0	0	0	1	0	0
NHM71.2586	NHMUK_ZD_1971.2586	NHM	collection	1953-07-23	Harrison_JL	yes	1953	TrusMadi	Trus_Madi_Mountain_Pampang_Camp	2300	3_Upper_montane	NA	NA	adult	yes	no	135	153	306	153	40	16	44.79	NA	25.01	20.93	NA	NA	0	0	0	0	0	1	0	1
NHM71.2587	NHMUK_ZD_1971.2587	NHM	collection	1962-12-14	Garcia_AD	yes	1962	Kinabalu	5_5_miles_SW_of_Tenom	1219	2_Lower_montane	female	NA	NA	no	no	NA	170	NA	150	37	18	NA	NA	NA	NA	NA	NA	0	0	0	0	0	0	0	0
NHM71.2588	NHMUK_ZD_1971.2588	NHM	collection	1962-12-24	Garcia_AD	yes	1962	Kinabalu	5_5_miles_SW_of_Tenom	1219	2_Lower_montane	male	NA	adult	yes	no	120	170	315	145	40	9	44.55	25.85	25.07	21.19	NA	NA	1	0	0	0	0	1	0	1
USNM292477	USNM292477	USNM	collection	1951-06-30	Johnson_DH	yes	1951	Kinabalu	Mount_Kinabalu_Bundu_Tuhan	1110	1_Lowland	male	NA	NOadult	yes	no	NA	166	318	152	40	15	42.93	23.78	23.63	19.59	NA	NA	0	0	0	0	0	0	0	1
USNM292478	USNM292478	USNM	collection	1951-07-01	Johnson_DH	yes	1951	Kinabalu	Mount_Kinabalu_Bundu_Tuhan	1110	1_Lowland	male	NA	adult	yes	no	NA	165	325	160	42	15	45.35	26.31	25.18	NA	NA	NA	0	0	0	0	0	1	1	1
USNM292479	USNM292479	USNM	collection	1951-07-01	Johnson_DH	yes	1951	Kinabalu	Mount_Kinabalu_Bundu_Tuhan	1110	1_Lowland	female	NA	NOadult	yes	no	NA	172	315	143	40	13	42.86	23.81	24.11	20.52	NA	NA	0	0	0	0	0	0	0	1
USNM292480	USNM292480	USNM	collection	1951-07-01	Johnson_DH	yes	1951	Kinabalu	Mount_Kinabalu_Bundu_Tuhan	1110	1_Lowland	female	NA	adult	yes	no	NA	169	320	151	42	15	46.02	25.64	25.56	21.95	NA	NA	0	0	0	0	0	1	1	1
USNM292481	USNM292481	USNM	collection	1951-07-01	Johnson_DH	yes	1951	Kinabalu	Mount_Kinabalu_Bundu_Tuhan	1110	1_Lowland	male	NA	NOadult	yes	no	NA	169	322	153	44	14	NA	NA	NA	NA	NA	NA	0	0	0	0	0	0	0	0
USNM292482	USNM292482	USNM	collection	1951-07-02	Johnson_DH	yes	1951	Kinabalu	Mount_Kinabalu_Bundu_Tuhan	1110	1_Lowland	male	NA	adult	yes	no	NA	169	312	143	43	15	44.93	25.66	24.70	21.70	NA	NA	0	0	0	0	0	1	1	1
USNM292483	USNM292483	USNM	collection	1951-07-02	Johnson_DH	yes	1951	Kinabalu	Mount_Kinabalu_Bundu_Tuhan	1110	1_Lowland	female	NA	NOadult	yes	no	NA	152	298	146	40	14	43.48	22.86	24.73	20.57	NA	NA	0	0	0	0	0	0	0	1
USNM292484	USNM292484	USNM	collection	1951-07-02	Johnson_DH	yes	1951	Kinabalu	Mount_Kinabalu_Bundu_Tuhan	1110	1_Lowland	female	NA	adult	yes	no	NA	176	333	157	40	16	47.10	26.44	26.73	22.41	NA	NA	0	0	0	0	0	1	1	1
USNM292485	USNM292485	USNM	collection	1951-07-02	Johnson_DH	yes	1951	Kinabalu	Mount_Kinabalu_Bundu_Tuhan	1110	1_Lowland	female	NA	adult	yes	no	NA	162	309	147	41	14	44.22	24.13	25.18	21.19	NA	NA	0	0	0	0	0	1	1	1
USNM292486	USNM292486	USNM	collection	1951-07-03	Johnson_DH	yes	1951	Kinabalu	Mount_Kinabalu_Bundu_Tuhan	1110	1_Lowland	male	NA	adult	yes	no	NA	175	335	160	43	14	45.00	26.24	24.95	20.61	NA	NA	0	0	0	0	0	1	1	1
USNM292487	USNM292487	USNM	collection	1951-07-03	Johnson_DH	yes	1951	Kinabalu	Mount_Kinabalu_Bundu_Tuhan	1110	1_Lowland	female	NA	NOadult	yes	no	NA	148	292	144	40	13	NA	NA	NA	NA	NA	NA	0	0	0	0	0	0	0	0
USNM292488	USNM292488	USNM	collection	1951-07-04	Johnson_DH	yes	1951	Kinabalu	Mount_Kinabalu_Bundu_Tuhan	1110	1_Lowland	male	NA	NOadult	yes	no	NA	152	292	140	44	13	NA	NA	NA	NA	NA	NA	0	0	0	0	0	0	0	0
USNM292489	USNM292489	USNM	collection	1951-07-06	Johnson_DH	yes	1951	Kinabalu	Mount_Kinabalu_Bundu_Tuhan	1110	1_Lowland	female	NA	NOadult	yes	no	NA	174	323	149	41	14	NA	NA	NA	NA	NA	NA	0	0	0	0	0	0	0	0
USNM292490	USNM292490	USNM	collection	1951-07-06	Johnson_DH	yes	1951	Kinabalu	Mount_Kinabalu_Bundu_Tuhan	1110	1_Lowland	male	NA	adult	yes	no	NA	174	326	152	43	15	44.14	25.95	25.28	20.94	NA	NA	0	0	0	0	0	1	1	1
USNM292491	USNM292491	USNM	collection	1951-07-06	Johnson_DH	yes	1951	Kinabalu	Mount_Kinabalu_Bundu_Tuhan	1110	1_Lowland	female	NA	NOadult	yes	no	NA	157	312	155	40	13	44.37	23.13	25.13	21.31	NA	NA	0	0	0	0	0	0	0	1
USNM292492	USNM292492	USNM	collection	1951-07-06	Johnson_DH	yes	1951	Kinabalu	Mount_Kinabalu_Bundu_Tuhan	1110	1_Lowland	male	NA	adult	yes	no	NA	175	327	152	41	14	44.51	25.85	24.49	20.33	NA	NA	0	0	0	0	0	1	1	1
USNM292493	USNM292493	USNM	collection	1951-07-06	NA	yes	1951	Kinabalu	Mount_Kinabalu_Bundu_Tuhan	1005	1_Lowland	male	NA	adult	yes	no	NA	NA	NA	NA	NA	NA	45.90	25.35	25.75	21.76	NA	NA	0	0	0	0	0	1	0	1
USNM292494	USNM292494	USNM	collection	1951-07-06	Johnson_DH	yes	1951	Kinabalu	Mount_Kinabalu_Bundu_Tuhan	1110	1_Lowland	male	NA	adult	yes	no	NA	174	330	156	41	14	43.99	25.36	24.88	20.30	NA	NA	0	0	0	0	0	1	1	1
USNM292495	USNM292495	USNM	collection	1951-07-06	Johnson_DH	yes	1951	Kinabalu	Mount_Kinabalu_Bundu_Tuhan	1110	1_Lowland	male	NA	NOadult	yes	no	NA	151	295	144	41	13	NA	NA	NA	NA	NA	NA	0	0	0	0	0	0	0	0
USNM292496	USNM292496	USNM	collection	1951-07-06	Johnson_DH	yes	1951	Kinabalu	Mount_Kinabalu_Bundu_Tuhan	1110	1_Lowland	female	NA	adult	yes	no	NA	180	335	155	41	15	46.24	25.02	26.20	21.68	NA	NA	0	0	0	0	0	1	1	1
USNM292497	USNM292497	USNM	collection	1951-07-06	Johnson_DH	yes	1951	Kinabalu	Mount_Kinabalu_Bundu_Tuhan	1110	1_Lowland	male	NA	adult	yes	no	NA	206	350	144	40	15	45.00	25.06	25.55	21.19	NA	NA	0	0	0	0	0	1	1	1
USNM292498	USNM292498	USNM	collection	1951-07-06	Johnson_DH	yes	1951	Kinabalu	Mount_Kinabalu_Bundu_Tuhan	1110	1_Lowland	male	NA	adult	yes	no	NA	170	318	148	41	14	45.55	25.97	25.82	21.47	NA	NA	0	0	0	0	0	1	1	1
USNM292499	USNM292499	USNM	collection	1951-07-06	Johnson_DH	yes	1951	Kinabalu	Mount_Kinabalu_Bundu_Tuhan	1110	1_Lowland	male	NA	adult	yes	no	NA	171	322	151	41	13	46.00	26.09	26.03	21.12	NA	NA	0	0	0	0	0	1	1	1
USNM292500	USNM292500	USNM	collection	1951-07-06	Johnson_DH	yes	1951	Kinabalu	Mount_Kinabalu_Bundu_Tuhan	1110	1_Lowland	male	NA	adult	yes	no	NA	179	330	151	43	15	44.90	26.18	25.28	NA	NA	NA	0	0	0	0	0	1	1	1
USNM292501	USNM292501	USNM	collection	1951-07-06	NA	yes	1951	Kinabalu	Mount_Kinabalu_Bundu_Tuhan	1005	1_Lowland	male	NA	NOadult	yes	no	NA	NA	NA	NA	NA	NA	44.29	25.46	24.62	19.89	NA	NA	0	0	0	0	0	0	0	1
USNM292502	USNM292502	USNM	collection	1951-07-06	NA	yes	1951	Kinabalu	Mount_Kinabalu_Bundu_Tuhan	1005	1_Lowland	male	NA	NOadult	yes	no	NA	NA	NA	NA	NA	NA	NA	NA	NA	NA	NA	NA	0	0	0	0	0	0	0	0
USNM292503	USNM292503	USNM	collection	1951-07-07	Johnson_DH	yes	1951	Kinabalu	Mount_Kinabalu_Bundu_Tuhan	1110	1_Lowland	female	NA	adult	yes	no	NA	180	331	151	43	15	45.12	26.98	25.33	21.09	NA	NA	0	0	0	0	0	1	1	1
USNM292504	USNM292504	USNM	collection	1951-07-07	Johnson_DH	yes	1951	Kinabalu	Mount_Kinabalu_Bundu_Tuhan	1110	1_Lowland	male	NA	adult	yes	no	NA	166	313	147	42	14	44.47	24.92	25.00	21.15	NA	NA	0	0	0	0	0	1	1	1
USNM292505	USNM292505	USNM	collection	1951-07-07	Johnson_DH	yes	1951	Kinabalu	Mount_Kinabalu_Bundu_Tuhan	1110	1_Lowland	male	NA	NA	no	no	NA	160	305	145	38	14	NA	24.73	24.18	21.04	NA	NA	0	0	0	0	0	0	0	1
USNM292506	USNM292506	USNM	collection	1951-07-07	Johnson_DH	yes	1951	Kinabalu	Mount_Kinabalu_Bundu_Tuhan	1110	1_Lowland	male	NA	adult	yes	no	NA	161	314	153	43	15	44.71	25.74	25.20	21.03	NA	NA	0	0	0	0	0	1	1	1
USNM292507	USNM292507	USNM	collection	1951-07-07	Johnson_DH	yes	1951	Kinabalu	Mount_Kinabalu_Bundu_Tuhan	1110	1_Lowland	female	NA	NOadult	yes	no	NA	165	305	140	40	15	NA	NA	NA	NA	NA	NA	0	0	0	0	0	0	0	0
USNM292508	USNM292508	USNM	collection	1951-07-07	Johnson_DH	yes	1951	Kinabalu	Mount_Kinabalu_Bundu_Tuhan	1110	1_Lowland	female	NA	NOadult	yes	no	NA	164	304	140	44	14	NA	NA	NA	NA	NA	NA	0	0	0	0	0	0	0	0
USNM292509	USNM292509	USNM	collection	1951-07-07	Johnson_DH	yes	1951	Kinabalu	Mount_Kinabalu_Bundu_Tuhan	1110	1_Lowland	female	NA	adult	yes	no	NA	172	321	149	40	14	44.53	26.01	25.09	20.56	NA	NA	0	0	0	0	0	1	1	1
USNM292510	USNM292510	USNM	collection	1951-07-08	Johnson_DH	yes	1951	Kinabalu	Mount_Kinabalu_Bundu_Tuhan	1110	1_Lowland	male	NA	NOadult	yes	no	NA	165	315	150	41	15	42.92	NA	NA	NA	NA	NA	0	0	0	0	0	0	0	1
USNM292511	USNM292511	USNM	collection	1951-07-08	Johnson_DH	yes	1951	Kinabalu	Mount_Kinabalu_Bundu_Tuhan	1110	1_Lowland	female	NA	NOadult	yes	no	NA	182	333	151	42	15	NA	NA	NA	NA	NA	NA	0	0	0	0	0	0	0	0
USNM292512	USNM292512	USNM	collection	1951-07-08	Johnson_DH	yes	1951	Kinabalu	Mount_Kinabalu_Bundu_Tuhan	1110	1_Lowland	female	NA	adult	yes	no	NA	172	333	161	41	14	45.78	24.84	25.61	21.77	NA	NA	0	0	0	0	0	1	1	1
USNM292514	USNM292514	USNM	collection	1951-07-08	Johnson_DH	yes	1951	Kinabalu	Mount_Kinabalu_Bundu_Tuhan	1110	1_Lowland	male	NA	NOadult	yes	no	NA	168	318	150	41	14	NA	NA	NA	NA	NA	NA	0	0	0	0	0	0	0	0
USNM292515	USNM292515	USNM	collection	1951-07-09	Johnson_DH	yes	1951	Kinabalu	Mount_Kinabalu_Bundu_Tuhan	1110	1_Lowland	male	NA	adult	yes	no	NA	169	337	168	43	15	NA	26.61	25.24	22.05	NA	NA	0	0	0	0	0	1	1	1
USNM292516	USNM292516	USNM	collection	1951-07-09	Johnson_DH	yes	1951	Kinabalu	Mount_Kinabalu_Bundu_Tuhan	1110	1_Lowland	male	NA	NOadult	yes	no	NA	171	321	150	39	12	43.09	23.56	24.04	19.60	NA	NA	0	0	0	0	0	0	0	1
USNM292517	USNM292517	USNM	collection	1951-07-09	Johnson_DH	yes	1951	Kinabalu	Mount_Kinabalu_Bundu_Tuhan	1110	1_Lowland	male	NA	NOadult	yes	no	NA	146	291	145	41	12	NA	NA	NA	NA	NA	NA	0	0	0	0	0	0	0	0
USNM292518	USNM292518	USNM	collection	1951-07-09	Johnson_DH	yes	1951	Kinabalu	Mount_Kinabalu_Bundu_Tuhan	1110	1_Lowland	male	NA	NOadult	yes	no	NA	158	303	145	43	13	NA	NA	NA	NA	NA	NA	0	0	0	0	0	0	0	0
USNM292519	USNM292519	USNM	collection	1951-07-09	Johnson_DH	yes	1951	Kinabalu	Mount_Kinabalu_Bundu_Tuhan	1110	1_Lowland	male	NA	NA	no	no	NA	145	281	136	39	13	NA	NA	NA	NA	NA	NA	0	0	0	0	0	0	0	0
USNM292520	USNM292520	USNM	collection	1951-07-09	Johnson_DH	yes	1951	Kinabalu	Mount_Kinabalu_Bundu_Tuhan	1110	1_Lowland	male	NA	NOadult	yes	no	NA	126	268	142	41	13	NA	NA	NA	NA	NA	NA	0	0	0	0	0	0	0	0
USNM292521	USNM292521	USNM	collection	1951-07-10	NA	yes	1951	Kinabalu	Mount_Kinabalu_Bundu_Tuhan	1005	1_Lowland	female	NA	adult	yes	no	NA	NA	NA	NA	NA	NA	43.46	24.92	24.83	NA	NA	NA	0	0	0	0	0	1	0	1
USNM292522	USNM292522	USNM	collection	1951-07-10	NA	yes	1951	Kinabalu	Mount_Kinabalu_Bundu_Tuhan	1005	1_Lowland	female	NA	adult	yes	no	NA	NA	NA	NA	NA	NA	43.02	25.81	24.49	NA	NA	NA	0	0	0	0	0	1	0	1
USNM292523	USNM292523	USNM	collection	1951-07-10	NA	yes	1951	Kinabalu	Mount_Kinabalu_Bundu_Tuhan	1005	1_Lowland	female	NA	adult	yes	no	NA	NA	NA	NA	NA	NA	45.15	25.77	25.69	NA	NA	NA	0	0	0	0	0	1	0	1
USNM292524	USNM292524	USNM	collection	1951-07-10	NA	yes	1951	Kinabalu	Mount_Kinabalu_Bundu_Tuhan	1005	1_Lowland	female	NA	adult	yes	no	NA	NA	NA	NA	NA	NA	45.53	24.70	25.74	NA	NA	NA	0	0	0	0	0	1	0	1
USNM292525	USNM292525	USNM	collection	1951-07-10	NA	yes	1951	Kinabalu	Mount_Kinabalu_Bundu_Tuhan	1005	1_Lowland	female	NA	adult	yes	no	NA	NA	NA	NA	NA	NA	44.72	24.80	25.54	NA	NA	NA	0	0	0	0	0	1	0	1
USNM292526	USNM292526	USNM	collection	1951-07-10	NA	yes	1951	Kinabalu	Mount_Kinabalu_Bundu_Tuhan	1005	1_Lowland	male	NA	adult	yes	no	NA	NA	NA	NA	NA	NA	NA	25.99	NA	NA	NA	NA	0	0	0	0	0	1	0	1
USNM292527	USNM292527	USNM	collection	1951-07-10	NA	yes	1951	Kinabalu	Mount_Kinabalu_Bundu_Tuhan	1005	1_Lowland	male	NA	NOadult	yes	no	NA	NA	NA	NA	NA	NA	NA	NA	NA	NA	NA	NA	0	0	0	0	0	0	0	0
USNM292528	USNM292528	USNM	collection	1951-07-10	NA	yes	1951	Kinabalu	Mount_Kinabalu_Bundu_Tuhan	1005	1_Lowland	male	NA	NA	no	no	NA	NA	NA	NA	NA	NA	45.50	25.35	25.54	NA	NA	NA	0	0	0	0	0	0	0	1
USNM292529	USNM292529	USNM	collection	1951-07-10	NA	yes	1951	Kinabalu	Mount_Kinabalu_Bundu_Tuhan	1005	1_Lowland	female	NA	NOadult	yes	no	NA	NA	NA	NA	NA	NA	43.06	23.72	23.84	20.28	NA	NA	0	0	0	0	0	0	0	1
USNM292530	USNM292530	USNM	collection	1951-07-10	NA	yes	1951	Kinabalu	Mount_Kinabalu_Bundu_Tuhan	1005	1_Lowland	male	NA	adult	yes	no	NA	NA	NA	NA	NA	NA	47.30	26.50	26.20	22.58	NA	NA	0	0	0	0	0	1	0	1
USNM292531	USNM292531	USNM	collection	1951-07-10	NA	yes	1951	Kinabalu	Mount_Kinabalu_Bundu_Tuhan	1005	1_Lowland	male	NA	adult	yes	no	NA	NA	NA	NA	NA	NA	46.57	26.16	26.15	NA	NA	NA	0	0	0	0	0	1	0	1
USNM292532	USNM292532	USNM	collection	1951-07-10	NA	yes	1951	Kinabalu	Mount_Kinabalu_Bundu_Tuhan	1005	1_Lowland	NA	NA	NA	no	no	NA	NA	NA	NA	NA	NA	NA	NA	NA	NA	NA	NA	0	0	0	0	0	0	0	0
USNM292533	USNM292533	USNM	collection	1951-07-26	Johnson_DH	yes	1951	Kinabalu	Mount_Kinabalu_Kamborangah	1877	2_Lower_montane	female	NA	adult	yes	no	NA	162	316	154	41	15	42.55	24.13	23.57	18.74	NA	NA	0	0	0	0	0	1	1	1
USNM292534	USNM292534	USNM	collection	1951-07-26	Johnson_DH	yes	1951	Kinabalu	Mount_Kinabalu_Kamborangah	1877	2_Lower_montane	male	NA	adult	yes	no	NA	166	298	132	43	15	44.02	25.59	23.85	19.88	NA	NA	0	0	0	0	0	1	1	1
USNM292536	USNM292536	USNM	collection	1951-07-27	NA	yes	1951	Kinabalu	Mount_Kinabalu_Kamaranga	2438	3_Upper_montane	NA	NA	NA	no	no	NA	NA	NA	NA	NA	NA	NA	NA	NA	NA	NA	NA	0	0	0	0	0	0	0	0
USNM292537	USNM292537	USNM	collection	1951-07-27	Johnson_DH	yes	1951	Kinabalu	Mount_Kinabalu_Kamborangah	1877	2_Lower_montane	female	NA	adult	yes	no	NA	148	280	132	40	12	41.40	23.72	22.51	18.97	NA	NA	0	0	0	0	0	1	1	1
USNM292538	USNM292538	USNM	collection	1951-07-28	NA	yes	1951	Kinabalu	Mount_Kinabalu_Kamborangah	2438	3_Upper_montane	female	NA	NOadult	yes	no	NA	NA	NA	NA	NA	NA	39.85	22.74	21.93	17.56	NA	NA	0	0	0	0	0	0	0	1
USNM292539	USNM292539	USNM	collection	1951-07-28	NA	yes	1951	Kinabalu	Mount_Kinabalu_Kamborangah	2438	3_Upper_montane	NA	NA	adult	yes	no	NA	NA	NA	NA	NA	NA	44.69	25.82	24.56	20.05	NA	NA	0	0	0	0	0	1	0	1
USNM292540	USNM292540	USNM	collection	1951-07-28	NA	yes	1951	Kinabalu	Mount_Kinabalu_Kamborangah	2438	3_Upper_montane	NA	NA	adult	yes	no	NA	NA	NA	NA	NA	NA	NA	NA	23.16	18.37	NA	NA	0	0	0	0	0	1	0	1
USNM300894	USNM300894	USNM	collection	1953-08-09	Traub_R	yes	1953	Kinabalu	Mount_Kinabalu_Tenompak	1676	2_Lower_montane	male	NA	adult	yes	no	NA	146	298	152	42	14	45.90	25.04	26.37	21.85	NA	NA	0	0	0	0	0	1	1	1
USNM300895	USNM300895	USNM	collection	1953-08-16	Traub_R	yes	1953	Kinabalu	Mount_Kinabalu_Kamborangah	1877	2_Lower_montane	female	NA	NOadult	yes	no	NA	174	304	130	42	13	42.42	24.27	22.69	18.84	NA	NA	0	0	0	0	0	0	0	1
USNM300896	USNM300896	USNM	collection	1953-08-25	MammalsFieldNumber_B_19360	yes	1953	Kinabalu	Mount_Kinabalu_Mari_Parei	1554	2_Lower_montane	NA	NA	adult	yes	no	NA	106	224	118	37	14	42.58	25.17	23.85	20.13	NA	NA	0	0	0	0	0	1	0	1
USNM300897	USNM300897	USNM	collection	1953-07-21	Elbel_RE	yes	1953	TrusMadi	Trus_Madi_Mountain_Pampang_Camp	2333	3_Upper_montane	male	NA	adult	yes	no	110	163	313	150	40	NA	NA	23.84	NA	NA	NA	NA	1	0	0	0	0	1	1	1
USNM300898	USNM300898	USNM	collection	1953-07-23	Elbel_RE	yes	1953	TrusMadi	Trus_Madi_Mountain_Pampang_Camp	2333	3_Upper_montane	female	NA	adult	yes	no	142	165	315	150	42	NA	46.00	25.74	25.80	22.26	NA	NA	1	0	0	0	0	1	1	1
USNM300899	USNM300899	USNM	collection	1953-07-30	Traub_R	yes	1953	TrusMadi	Trus_Madi_Mountain_Pampang_Camp	2333	3_Upper_montane	male	NA	adult	yes	no	145	175	325	150	40	NA	44.85	25.40	25.22	21.46	NA	NA	1	0	0	0	0	1	1	1
USNM300900	USNM300900	USNM	collection	1953-08-01	Elbel_RE	yes	1953	TrusMadi	Trus_Madi_Mountain_Pampang_Camp	2333	3_Upper_montane	female	NA	NOadult	yes	no	140	150	295	145	39	NA	NA	NA	NA	NA	NA	NA	0	0	0	0	0	0	0	0

## Sheet: README
Table S1. Specimens examined in this study, it includes the following associated data:
Individual	unique code assigned to specimens in the field, museum code was specified when this field code was not available
Museum_code	unique code for those specimens hosted in scientific collections
Collection	EBD-CSIC: Estación Biológica de Doñana, Spanish National Research Council; FMNH: Field Museum of Natural History; MCZ: Harvard Museum of Comparative Zoology; NH: Sabah Museum; NHM: Natural History Museum of London; USNM: Smithsonian National Museum of Natural History
Data_origin	whether the specimen associated data was from fieldwork or a scientific collection
Date_collected	date the animal was sampled/collected.
Collector	person that collected the specimen and/or external morphological data
Specimen_collected_for_museum	whether the specimen was collected or not
Year	year of collection of the specimen
Mountain	mountain where the specimen was caught.
Location	locality where the specimen was caught
Elevation	elevation extracted from a SRTM Digital Elevation Model with 1-arcsecond resolution (earthexplorer.usgs.gov) given the coordinates (Lat/Lon) of the trap location.
Vegetation_zone	vegetation zone where the specimen was sampled/collected. < 1200 m: Lowland; 1200-2000 m: Lower montane; 2000-2800 m: Upper montane; 2800-3400 m: Subalpine
Sex	determined from external sexual organs, or, in the case of collected animals, through dissection during specimen preparation
Reproductive_state	reproductive state of the individual
Age	based on HB, body weight and the presence of external sexual organs for field specimens. Adults from museum specimens were determined from gonad label-associated information
Aged_by_dentition	whether the specimen was aged based on dentition or not
Aged_by_gonads	whether the specimen was aged based on the presence of gonads or not
Weight	measured with the appropriate Pesola (10g, 30g, 100g, 300g or 1kg) given the weight of the animal (g)
Headbody	distance from the tip of snout to the base of the tail measured with a ruler to the nearest mm (in mm).
Total_lenght	distance from the tip of snout to the tip of the tail measured with a ruler to the nearest mm (in mm).
Tail	distance from the base to the tip of the tail measured with a ruler to the nearest mm (in mm).
Hindfoot	distance from the heel to the tip of the longest toe measured with caliper or ruler (claws not included) (in mm).
Ear	distance from the base of the notch below the ear opening to the most distant point of the margin of the pinna measured with a caliper to the nearest 0.1 mm (in mm).
CIL	greatest distance between anterior‐most surface of I1 and caudal surface of occipital condyle
ZB	greatest distance between lateral surfaces of zygomatic arch
UTL	greatest distance between anterior‐most surface of I1 and posterior‐most surface of M3
RL	greatest distance between anterior‐most surface of premaxilla and anterior‐most surface of lacrimal foramen
Hair_Scapula	Length of overfur on the dorsum at the scapula level
Hair_Rump	Length of overfur on the dorsum at the rump level
D1_weight	whether the specimen was included in Dataset 1 for analyses of weight (adults aged based on the presence of gonads or on the confirmation of their permanent dentition)
D2_headbody	whether the specimen was included in Dataset 2 analyses of head-body lenght (adults aged based on the confirmation of their permanent dentition that were from the EBD-CSIC collection)
D2_tail	whether the specimen was included in Dataset 2 analyses of tail lenght (adults aged based on the confirmation of their permanent dentition that were from the EBD-CSIC collection)
D3_hindfoot	whether the specimen was included in Dataset 3 analyses of hindfoot lenght (adults aged based on their dentition or gonads measured by a unic collector from the EBD-CSIC collection and measured by a single collector
D3_ear	whether the specimen was included in Dataset 3 analyses of ear lenght (adults aged based on their dentition or gonads measured by a unic collector from the EBD-CSIC collection and measured by a single collector
D4_all_adults_NH	whether the specimen was included in Dataset 4 analyses of external measures (except hindfoot) (adults aged by any of the methods described plus all individuals from Sabah Museum collection, for which we did not have information regarding age)
D5_hindfoot_USA	whether the specimen was included in Dataset 5 analyses of hindfoot using only measurements taken including nails (following the U.S.A. procedure) (adults aged by any of the methods described)
D6_skulls	whether the specimen was included in Dataset 6 analyses of skull measurements (CIL, RL, ZB, UTL)
